# Supplementary material for: NanoSTR: A method for detection of target short tandem repeats based on nanopore sequencing data
Source: Front Mol Biosci. 2023 Jan 18;10:1093519. doi: 10.3389/fmolb.2023.1093519 (PMC9889824; doi:10.3389/fmolb.2023.1093519)
Supplement: Supplementary file 2 [file Table1.xlsx]

## Sheet: Sheet1
Table S1. Statistics of the NanoSTR analysis results for the three simulated data.
Sample	Raw Reads					Raw Bases	Clean Reads	Clean Bases	Ratio	GC Content	Q7 Rate	Locus	Chromosome	Start	End	Bracket Sequence	CE	Assembly	Unit Bases	Extra Bases	Expected		NanoSTR		Information
	Aligned	Unaligned	Mismatch Number	Insertion Number	Deletion Number																Allele1	Allele2	Allele1	Allele2
Simulated_data-1	100000	0	0	0	0	121255422	100000	121255422	1	0.376843	1	DYS392	chrY	20471987	20472025	[ATA]13	13	GRCh38.p12	3	0	13	13	13	13	Flanking-1Kb/No Errors
												DYS438	chrY	12825889	12825948	[TTTTC]12	12	GRCh38.p12	5	0	10	10	10	10
												DYS448	chrY	22218923	22219078	[AGAGAT]n=11 [atagag]2 [agatag]3 [atag]2 agaa [AGAGAT]n=8	19	GRCh38.p12	6	42	19	19	19	19
												DYS635	chrY	12258860	12258951	[TAGA]9 [TACA]2 [TAGA]2 [TACA]2 [TAGA]2 [TACA]2 [TAGA]4	23	GRCh38.p12	4	0	23	23	23	23
Simulated_data-2	100000	0	0	0	0	121255422	100000	121255422	1	0.375946	1	DYS392	chrY	20471987	20472025	[ATA]13	13	GRCh38.p12	3	0	13	17	13	17
												DYS438	chrY	12825889	12825948	[TTTTC]12	12	GRCh38.p12	5	0	10	14	10	14
												DYS448	chrY	22218923	22219078	[AGAGAT]n=11 [atagag]2 [agatag]3 [atag]2 agaa [AGAGAT]n=8	19	GRCh38.p12	6	42	19	23	19	23
												DYS635	chrY	12258860	12258951	[TAGA]9 [TACA]2 [TAGA]2 [TACA]2 [TAGA]2 [TACA]2 [TAGA]4	23	GRCh38.p12	4	0	23	27	23	27
Simulated_data-3	100000	0	0	0	0	121255422	100000	121255422	1	0.377752	1	DYS392	chrY	20471987	20472025	[ATA]13	13	GRCh38.p12	3	0	9	13	9	13
												DYS438	chrY	12825889	12825948	[TTTTC]12	12	GRCh38.p12	5	0	6	10	6	10
												DYS448	chrY	22218923	22219078	[AGAGAT]n=11 [atagag]2 [agatag]3 [atag]2 agaa [AGAGAT]n=8	19	GRCh38.p12	6	42	15	19	15	19
												DYS635	chrY	12258860	12258951	[TAGA]9 [TACA]2 [TAGA]2 [TACA]2 [TAGA]2 [TACA]2 [TAGA]4	23	GRCh38.p12	4	0	19	23	19	23
Simulated_data-1	94118	5882	4364622	2442874	2881004	116113607	100000	116113607	1	0.405298	1	DYS392	chrY	20471987	20472025	[ATA]13	13	GRCh38.p12	3	0	13	13	12	12	Flanking-1Kb/Errors
												DYS438	chrY	12825889	12825948	[TTTTC]12	12	GRCh38.p12	5	0	10	10	10	10
												DYS448	chrY	22218923	22219078	[AGAGAT]n=11 [atagag]2 [agatag]3 [atag]2 agaa [AGAGAT]n=8	19	GRCh38.p12	6	42	19	19	19	19
												DYS635	chrY	12258860	12258951	[TAGA]9 [TACA]2 [TAGA]2 [TACA]2 [TAGA]2 [TACA]2 [TAGA]4	23	GRCh38.p12	4	0	23	23	23	23
Simulated_data-2	94118	5882	4364668	2439294	2877593	116220475	100000	116220475	1	0.404563	1	DYS392	chrY	20471987	20472025	[ATA]13	13	GRCh38.p12	3	0	13	17	12	16
												DYS438	chrY	12825889	12825948	[TTTTC]12	12	GRCh38.p12	5	0	10	14	10	14
												DYS448	chrY	22218923	22219078	[AGAGAT]n=11 [atagag]2 [agatag]3 [atag]2 agaa [AGAGAT]n=8	19	GRCh38.p12	6	42	19	23	19	23
												DYS635	chrY	12258860	12258951	[TAGA]9 [TACA]2 [TAGA]2 [TACA]2 [TAGA]2 [TACA]2 [TAGA]4	23	GRCh38.p12	4	0	23	27	23	27
Simulated_data-3	94118	5882	4375605	2447150	2885056	116425447	100000	116425447	1	0.40622	1	DYS392	chrY	20471987	20472025	[ATA]13	13	GRCh38.p12	3	0	9	13	8	12
												DYS438	chrY	12825889	12825948	[TTTTC]12	12	GRCh38.p12	5	0	6	10	6	10
												DYS448	chrY	22218923	22219078	[AGAGAT]n=11 [atagag]2 [agatag]3 [atag]2 agaa [AGAGAT]n=8	19	GRCh38.p12	6	42	15	19	15	19
												DYS635	chrY	12258860	12258951	[TAGA]9 [TACA]2 [TAGA]2 [TACA]2 [TAGA]2 [TACA]2 [TAGA]4	23	GRCh38.p12	4	0	19	23	19	23
Simulated_data-1	100000	0	0	0	0	788977121	100000	788977121	1	0.382216	1	DYS392	chrY	20471987	20472025	[ATA]13	13	GRCh38.p12	3	0	13	13	13	13	Flanking-10Kb/No Errors
												DYS438	chrY	12825889	12825948	[TTTTC]12	12	GRCh38.p12	5	0	10	10	10	10
												DYS448	chrY	22218923	22219078	[AGAGAT]n=11 [atagag]2 [agatag]3 [atag]2 agaa [AGAGAT]n=8	19	GRCh38.p12	6	42	19	19	19	19
												DYS635	chrY	12258860	12258951	[TAGA]9 [TACA]2 [TAGA]2 [TACA]2 [TAGA]2 [TACA]2 [TAGA]4	23	GRCh38.p12	4	0	23	23	23	23
Simulated_data-2	100000	0	0	0	0	788977121	100000	788977121	1	0.38214	1	DYS392	chrY	20471987	20472025	[ATA]13	13	GRCh38.p12	3	0	13	17	13	17
												DYS438	chrY	12825889	12825948	[TTTTC]12	12	GRCh38.p12	5	0	10	14	10	14
												DYS448	chrY	22218923	22219078	[AGAGAT]n=11 [atagag]2 [agatag]3 [atag]2 agaa [AGAGAT]n=8	19	GRCh38.p12	6	42	19	23	19	23
												DYS635	chrY	12258860	12258951	[TAGA]9 [TACA]2 [TAGA]2 [TACA]2 [TAGA]2 [TACA]2 [TAGA]4	23	GRCh38.p12	4	0	23	27	23	27
Simulated_data-3	100000	0	0	0	0	788977121	100000	788977121	1	0.382444	1	DYS392	chrY	20471987	20472025	[ATA]13	13	GRCh38.p12	3	0	9	13	9	13
												DYS438	chrY	12825889	12825948	[TTTTC]12	12	GRCh38.p12	5	0	6	10	6	10
												DYS448	chrY	22218923	22219078	[AGAGAT]n=11 [atagag]2 [agatag]3 [atag]2 agaa [AGAGAT]n=8	19	GRCh38.p12	6	42	15	19	15	19
												DYS635	chrY	12258860	12258951	[TAGA]9 [TACA]2 [TAGA]2 [TACA]2 [TAGA]2 [TACA]2 [TAGA]4	23	GRCh38.p12	4	0	19	23	19	23
Simulated_data-1	94118	5882	29729912	16708987	19636103	764317735	100000	764317735	1	0.407362	1	DYS392	chrY	20471987	20472025	[ATA]13	13	GRCh38.p12	3	0	13	13	12	13	Flanking-10Kb/Errors
												DYS438	chrY	12825889	12825948	[TTTTC]12	12	GRCh38.p12	5	0	10	10	10	10
												DYS448	chrY	22218923	22219078	[AGAGAT]n=11 [atagag]2 [agatag]3 [atag]2 agaa [AGAGAT]n=8	19	GRCh38.p12	6	42	19	19	19	19
												DYS635	chrY	12258860	12258951	[TAGA]9 [TACA]2 [TAGA]2 [TACA]2 [TAGA]2 [TACA]2 [TAGA]4	23	GRCh38.p12	4	0	23	23	23	23
Simulated_data-2	94118	5882	29670289	16677657	19596324	761899145	100000	761899145	1	0.406971	1	DYS392	chrY	20471987	20472025	[ATA]13	13	GRCh38.p12	3	0	13	17	12	16
												DYS438	chrY	12825889	12825948	[TTTTC]12	12	GRCh38.p12	5	0	10	14	10	14
												DYS448	chrY	22218923	22219078	[AGAGAT]n=11 [atagag]2 [agatag]3 [atag]2 agaa [AGAGAT]n=8	19	GRCh38.p12	6	42	19	23	19	19
												DYS635	chrY	12258860	12258951	[TAGA]9 [TACA]2 [TAGA]2 [TACA]2 [TAGA]2 [TACA]2 [TAGA]4	23	GRCh38.p12	4	0	23	27	23	27
Simulated_data-3	94118	5882	29659644	16663484	19582432	761674870	100000	761674870	1	0.407153	1	DYS392	chrY	20471987	20472025	[ATA]13	13	GRCh38.p12	3	0	9	13	8	12
												DYS438	chrY	12825889	12825948	[TTTTC]12	12	GRCh38.p12	5	0	6	10	6	10
												DYS448	chrY	22218923	22219078	[AGAGAT]n=11 [atagag]2 [agatag]3 [atag]2 agaa [AGAGAT]n=8	19	GRCh38.p12	6	42	15	19	19	19
												DYS635	chrY	12258860	12258951	[TAGA]9 [TACA]2 [TAGA]2 [TACA]2 [TAGA]2 [TACA]2 [TAGA]4	23	GRCh38.p12	4	0	19	23	19	23
Simulated_data-1	100000	0	0	0	0	795887101	100000	795887101	1	0.394114	1	DYS392	chrY	20471987	20472025	[ATA]13	13	GRCh38.p12	3	0	13	13	13	13	Flanking-100Kb/No Errors
												DYS438	chrY	12825889	12825948	[TTTTC]12	12	GRCh38.p12	5	0	10	10	10	10
												DYS448	chrY	22218923	22219078	[AGAGAT]n=11 [atagag]2 [agatag]3 [atag]2 agaa [AGAGAT]n=8	19	GRCh38.p12	6	42	19	19	19	19
												DYS635	chrY	12258860	12258951	[TAGA]9 [TACA]2 [TAGA]2 [TACA]2 [TAGA]2 [TACA]2 [TAGA]4	23	GRCh38.p12	4	0	23	23	23	23
Simulated_data-2	100000	0	0	0	0	795887101	100000	795887101	1	0.394022	1	DYS392	chrY	20471987	20472025	[ATA]13	13	GRCh38.p12	3	0	13	17	13	17
												DYS438	chrY	12825889	12825948	[TTTTC]12	12	GRCh38.p12	5	0	10	14	10	14
												DYS448	chrY	22218923	22219078	[AGAGAT]n=11 [atagag]2 [agatag]3 [atag]2 agaa [AGAGAT]n=8	19	GRCh38.p12	6	42	19	23	19	23
												DYS635	chrY	12258860	12258951	[TAGA]9 [TACA]2 [TAGA]2 [TACA]2 [TAGA]2 [TACA]2 [TAGA]4	23	GRCh38.p12	4	0	23	27	23	27
Simulated_data-3	100000	0	0	0	0	795887101	100000	795887101	1	0.393997	1	DYS392	chrY	20471987	20472025	[ATA]13	13	GRCh38.p12	3	0	9	13	9	13
												DYS438	chrY	12825889	12825948	[TTTTC]12	12	GRCh38.p12	5	0	6	10	6	10
												DYS448	chrY	22218923	22219078	[AGAGAT]n=11 [atagag]2 [agatag]3 [atag]2 agaa [AGAGAT]n=8	19	GRCh38.p12	6	42	15	19	15	19
												DYS635	chrY	12258860	12258951	[TAGA]9 [TACA]2 [TAGA]2 [TACA]2 [TAGA]2 [TACA]2 [TAGA]4	23	GRCh38.p12	4	0	19	23	19	23
Simulated_data-1	94118	5882	29832396	16770082	19690978	773276054	100000	773276054	1	0.417669	1	DYS392	chrY	20471987	20472025	[ATA]13	13	GRCh38.p12	3	0	13	13	12	13	Flanking-100Kb/Errors
												DYS438	chrY	12825889	12825948	[TTTTC]12	12	GRCh38.p12	5	0	10	10	10	10
												DYS448	chrY	22218923	22219078	[AGAGAT]n=11 [atagag]2 [agatag]3 [atag]2 agaa [AGAGAT]n=8	19	GRCh38.p12	6	42	19	19	18	19
												DYS635	chrY	12258860	12258951	[TAGA]9 [TACA]2 [TAGA]2 [TACA]2 [TAGA]2 [TACA]2 [TAGA]4	23	GRCh38.p12	4	0	23	23	23	23
Simulated_data-2	94118	5882	29757609	16735451	19650445	773574381	100000	773574381	1	0.417998	1	DYS392	chrY	20471987	20472025	[ATA]13	13	GRCh38.p12	3	0	13	17	13	13
												DYS438	chrY	12825889	12825948	[TTTTC]12	12	GRCh38.p12	5	0	10	14	10	14
												DYS448	chrY	22218923	22219078	[AGAGAT]n=11 [atagag]2 [agatag]3 [atag]2 agaa [AGAGAT]n=8	19	GRCh38.p12	6	42	19	23	19	23
												DYS635	chrY	12258860	12258951	[TAGA]9 [TACA]2 [TAGA]2 [TACA]2 [TAGA]2 [TACA]2 [TAGA]4	23	GRCh38.p12	4	0	23	27	23	23
Simulated_data-3	94118	5882	29861004	16788799	19721721	775259378	100000	775259378	1	0.417877	1	DYS392	chrY	20471987	20472025	[ATA]13	13	GRCh38.p12	3	0	9	13	12	12
												DYS438	chrY	12825889	12825948	[TTTTC]12	12	GRCh38.p12	5	0	6	10	6	10
												DYS448	chrY	22218923	22219078	[AGAGAT]n=11 [atagag]2 [agatag]3 [atag]2 agaa [AGAGAT]n=8	19	GRCh38.p12	6	42	15	19	15	15
												DYS635	chrY	12258860	12258951	[TAGA]9 [TACA]2 [TAGA]2 [TACA]2 [TAGA]2 [TACA]2 [TAGA]4	23	GRCh38.p12	4	0	19	23	19	23

## Sheet: Sheet2
Table S2. Statistics of the NanoSTR analysis results for the three simulated data with differenct error ratios.
Sample	Clean Reads	Clean Bases	Raw Reads			Raw Reads Ratio			Locus	Chromosome	Start	End	Bracket Sequence	CE	Assembly	Unit Bases	Extra Bases	Expected		NanoSTR
			Mismatch Number	Insertion Number	Deletion Number	Mismatch Number	Insertion Number	Deletion Number										Allele1	Allele2	Allele1	Allele2
Simulated_data-1	100000	795887101	0	0	0	0	0	0	D12S391	chr12	12297020	12297095	[AGAT]11 [AGAC]7 AGAT	19	GRCh38.p12	4	0	19	19	19	19
									D18S51	chr18	63281667	63281738	[AGAA]18	18	GRCh38.p12	4	0	18	18	18	18
									D22S1045	chr22	37140287	37140337	[ATT]14 ACT [ATT]2	17	GRCh38.p12	3	0	17	17	17	17
									DYS635	chrY	12258860	12258951	[TAGA]9 [TACA]2 [TAGA]2 [TACA]2 [TAGA]2 [TACA]2 [TAGA]4	23	GRCh38.p12	4	0	23	23	23	23
									DYS437	chrY	12346267	12346326	[TCTA]9 [TCTG]2 [TCTA]4	15	GRCh38.p12	4	0	15	15	15	15
									DYS438	chrY	12825889	12825948	[TTTTC]12	12	GRCh38.p12	5	0	12	12	12	12
									DYS390	chrY	15163067	15163162	[TAGA]4 CAGA [TAGA]11 [CAGA]8	24	GRCh38.p12	4	0	24	24	24	24
									DYS392	chrY	20471987	20472025	[ATA]13	13	GRCh38.p12	3	0	13	13	13	13
									DYS448	chrY	22218923	22219078	[AGAGAT]n=11 [atagag]2 [agatag]3 [atag]2 agaa [AGAGAT]n=8	19	GRCh38.p12	6	42	19	19	19	19
									DYS458	chrY	7999839	7999902	[GAAA]16	16	GRCh38.p12	4	0	16	16	16	16
Simulated_data-1	100000	802712028	30108114	16924182	19890211	0.037508	0.0210838	0.0247788	D12S391	chr12	12297020	12297095	[AGAT]11 [AGAC]7 AGAT	19	GRCh38.p12	4	0	19	19	19	19
									D18S51	chr18	63281667	63281738	[AGAA]18	18	GRCh38.p12	4	0	18	18	18	18
									D22S1045	chr22	37140287	37140337	[ATT]14 ACT [ATT]2	17	GRCh38.p12	3	0	17	17	17	17
									DYS635	chrY	12258860	12258951	[TAGA]9 [TACA]2 [TAGA]2 [TACA]2 [TAGA]2 [TACA]2 [TAGA]4	23	GRCh38.p12	4	0	23	23	23	23
									DYS437	chrY	12346267	12346326	[TCTA]9 [TCTG]2 [TCTA]4	15	GRCh38.p12	4	0	15	15	15	15
									DYS438	chrY	12825889	12825948	[TTTTC]12	12	GRCh38.p12	5	0	12	12	12	12
									DYS390	chrY	15163067	15163162	[TAGA]4 CAGA [TAGA]11 [CAGA]8	24	GRCh38.p12	4	0	24	24	24	24
									DYS392	chrY	20471987	20472025	[ATA]13	13	GRCh38.p12	3	0	13	13	13	13
									DYS448	chrY	22218923	22219078	[AGAGAT]n=11 [atagag]2 [agatag]3 [atag]2 agaa [AGAGAT]n=8	19	GRCh38.p12	6	42	19	19	19	19
									DYS458	chrY	7999839	7999902	[GAAA]16	16	GRCh38.p12	4	0	16	16	16	16
Simulated_data-1	100000	802717686	28514576	16027753	18830038	0.0355225	0.0199669	0.0234579	D12S391	chr12	12297020	12297095	[AGAT]11 [AGAC]7 AGAT	19	GRCh38.p12	4	0	19	19	19	19
									D18S51	chr18	63281667	63281738	[AGAA]18	18	GRCh38.p12	4	0	18	18	18	18
									D22S1045	chr22	37140287	37140337	[ATT]14 ACT [ATT]2	17	GRCh38.p12	3	0	17	17	17	17
									DYS635	chrY	12258860	12258951	[TAGA]9 [TACA]2 [TAGA]2 [TACA]2 [TAGA]2 [TACA]2 [TAGA]4	23	GRCh38.p12	4	0	23	23	23	23
									DYS437	chrY	12346267	12346326	[TCTA]9 [TCTG]2 [TCTA]4	15	GRCh38.p12	4	0	15	15	15	15
									DYS438	chrY	12825889	12825948	[TTTTC]12	12	GRCh38.p12	5	0	12	12	12	12
									DYS390	chrY	15163067	15163162	[TAGA]4 CAGA [TAGA]11 [CAGA]8	24	GRCh38.p12	4	0	24	24	24	24
									DYS392	chrY	20471987	20472025	[ATA]13	13	GRCh38.p12	3	0	13	13	13	13
									DYS448	chrY	22218923	22219078	[AGAGAT]n=11 [atagag]2 [agatag]3 [atag]2 agaa [AGAGAT]n=8	19	GRCh38.p12	6	42	19	19	19	19
									DYS458	chrY	7999839	7999902	[GAAA]16	16	GRCh38.p12	4	0	16	16	16	16
Simulated_data-1	100000	802768794	26995170	15178027	17827965	0.0336276	0.0189071	0.0222081	D12S391	chr12	12297020	12297095	[AGAT]11 [AGAC]7 AGAT	19	GRCh38.p12	4	0	19	19	19	19
									D18S51	chr18	63281667	63281738	[AGAA]18	18	GRCh38.p12	4	0	18	18	18	18
									D22S1045	chr22	37140287	37140337	[ATT]14 ACT [ATT]2	17	GRCh38.p12	3	0	17	17	17	17
									DYS635	chrY	12258860	12258951	[TAGA]9 [TACA]2 [TAGA]2 [TACA]2 [TAGA]2 [TACA]2 [TAGA]4	23	GRCh38.p12	4	0	23	23	23	23
									DYS437	chrY	12346267	12346326	[TCTA]9 [TCTG]2 [TCTA]4	15	GRCh38.p12	4	0	15	15	15	15
									DYS438	chrY	12825889	12825948	[TTTTC]12	12	GRCh38.p12	5	0	12	12	12	12
									DYS390	chrY	15163067	15163162	[TAGA]4 CAGA [TAGA]11 [CAGA]8	24	GRCh38.p12	4	0	24	24	24	24
									DYS392	chrY	20471987	20472025	[ATA]13	13	GRCh38.p12	3	0	13	13	13	13
									DYS448	chrY	22218923	22219078	[AGAGAT]n=11 [atagag]2 [agatag]3 [atag]2 agaa [AGAGAT]n=8	19	GRCh38.p12	6	42	19	19	19	19
									DYS458	chrY	7999839	7999902	[GAAA]16	16	GRCh38.p12	4	0	16	16	16	16
Simulated_data-1	100000	800355504	25317713	14232196	16721245	0.0316331	0.0177823	0.0208923	D12S391	chr12	12297020	12297095	[AGAT]11 [AGAC]7 AGAT	19	GRCh38.p12	4	0	19	19	19	19
									D18S51	chr18	63281667	63281738	[AGAA]18	18	GRCh38.p12	4	0	18	18	18	18
									D22S1045	chr22	37140287	37140337	[ATT]14 ACT [ATT]2	17	GRCh38.p12	3	0	17	17	17	17
									DYS635	chrY	12258860	12258951	[TAGA]9 [TACA]2 [TAGA]2 [TACA]2 [TAGA]2 [TACA]2 [TAGA]4	23	GRCh38.p12	4	0	23	23	23	23
									DYS437	chrY	12346267	12346326	[TCTA]9 [TCTG]2 [TCTA]4	15	GRCh38.p12	4	0	15	15	15	15
									DYS438	chrY	12825889	12825948	[TTTTC]12	12	GRCh38.p12	5	0	12	12	12	12
									DYS390	chrY	15163067	15163162	[TAGA]4 CAGA [TAGA]11 [CAGA]8	24	GRCh38.p12	4	0	24	24	24	24
									DYS392	chrY	20471987	20472025	[ATA]13	13	GRCh38.p12	3	0	13	13	13	13
									DYS448	chrY	22218923	22219078	[AGAGAT]n=11 [atagag]2 [agatag]3 [atag]2 agaa [AGAGAT]n=8	19	GRCh38.p12	6	42	19	19	19	19
									DYS458	chrY	7999839	7999902	[GAAA]16	16	GRCh38.p12	4	0	16	16	16	16
Simulated_data-1	100000	799252030	23718039	13331026	15669231	0.0296753	0.0166794	0.0196049	D12S391	chr12	12297020	12297095	[AGAT]11 [AGAC]7 AGAT	19	GRCh38.p12	4	0	19	19	19	19
									D18S51	chr18	63281667	63281738	[AGAA]18	18	GRCh38.p12	4	0	18	18	18	18
									D22S1045	chr22	37140287	37140337	[ATT]14 ACT [ATT]2	17	GRCh38.p12	3	0	17	17	17	17
									DYS635	chrY	12258860	12258951	[TAGA]9 [TACA]2 [TAGA]2 [TACA]2 [TAGA]2 [TACA]2 [TAGA]4	23	GRCh38.p12	4	0	23	23	23	23
									DYS437	chrY	12346267	12346326	[TCTA]9 [TCTG]2 [TCTA]4	15	GRCh38.p12	4	0	15	15	15	15
									DYS438	chrY	12825889	12825948	[TTTTC]12	12	GRCh38.p12	5	0	12	12	12	12
									DYS390	chrY	15163067	15163162	[TAGA]4 CAGA [TAGA]11 [CAGA]8	24	GRCh38.p12	4	0	24	24	24	24
									DYS392	chrY	20471987	20472025	[ATA]13	13	GRCh38.p12	3	0	13	13	13	13
									DYS448	chrY	22218923	22219078	[AGAGAT]n=11 [atagag]2 [agatag]3 [atag]2 agaa [AGAGAT]n=8	19	GRCh38.p12	6	42	19	19	19	19
									DYS458	chrY	7999839	7999902	[GAAA]16	16	GRCh38.p12	4	0	16	16	16	16
Simulated_data-1	100000	798933654	22120851	12442115	14616621	0.027688	0.0155734	0.0182952	D12S391	chr12	12297020	12297095	[AGAT]11 [AGAC]7 AGAT	19	GRCh38.p12	4	0	19	19	19	19
									D18S51	chr18	63281667	63281738	[AGAA]18	18	GRCh38.p12	4	0	18	18	18	18
									D22S1045	chr22	37140287	37140337	[ATT]14 ACT [ATT]2	17	GRCh38.p12	3	0	17	17	17	17
									DYS635	chrY	12258860	12258951	[TAGA]9 [TACA]2 [TAGA]2 [TACA]2 [TAGA]2 [TACA]2 [TAGA]4	23	GRCh38.p12	4	0	23	23	23	23
									DYS437	chrY	12346267	12346326	[TCTA]9 [TCTG]2 [TCTA]4	15	GRCh38.p12	4	0	15	15	15	15
									DYS438	chrY	12825889	12825948	[TTTTC]12	12	GRCh38.p12	5	0	12	12	12	12
									DYS390	chrY	15163067	15163162	[TAGA]4 CAGA [TAGA]11 [CAGA]8	24	GRCh38.p12	4	0	24	24	24	24
									DYS392	chrY	20471987	20472025	[ATA]13	13	GRCh38.p12	3	0	13	13	13	13
									DYS448	chrY	22218923	22219078	[AGAGAT]n=11 [atagag]2 [agatag]3 [atag]2 agaa [AGAGAT]n=8	19	GRCh38.p12	6	42	19	19	19	19
									DYS458	chrY	7999839	7999902	[GAAA]16	16	GRCh38.p12	4	0	16	16	16	16
Simulated_data-1	100000	798621007	20550033	11551649	13573394	0.0257319	0.0144645	0.016996	D12S391	chr12	12297020	12297095	[AGAT]11 [AGAC]7 AGAT	19	GRCh38.p12	4	0	19	19	19	19
									D18S51	chr18	63281667	63281738	[AGAA]18	18	GRCh38.p12	4	0	18	18	18	18
									D22S1045	chr22	37140287	37140337	[ATT]14 ACT [ATT]2	17	GRCh38.p12	3	0	17	17	17	17
									DYS635	chrY	12258860	12258951	[TAGA]9 [TACA]2 [TAGA]2 [TACA]2 [TAGA]2 [TACA]2 [TAGA]4	23	GRCh38.p12	4	0	23	23	23	23
									DYS437	chrY	12346267	12346326	[TCTA]9 [TCTG]2 [TCTA]4	15	GRCh38.p12	4	0	15	15	15	15
									DYS438	chrY	12825889	12825948	[TTTTC]12	12	GRCh38.p12	5	0	12	12	12	12
									DYS390	chrY	15163067	15163162	[TAGA]4 CAGA [TAGA]11 [CAGA]8	24	GRCh38.p12	4	0	24	24	24	24
									DYS392	chrY	20471987	20472025	[ATA]13	13	GRCh38.p12	3	0	13	13	13	13
									DYS448	chrY	22218923	22219078	[AGAGAT]n=11 [atagag]2 [agatag]3 [atag]2 agaa [AGAGAT]n=8	19	GRCh38.p12	6	42	19	19	19	19
									DYS458	chrY	7999839	7999902	[GAAA]16	16	GRCh38.p12	4	0	16	16	16	16
Simulated_data-1	100000	799765959	19007224	10685227	12553883	0.023766	0.0133604	0.0156969	D12S391	chr12	12297020	12297095	[AGAT]11 [AGAC]7 AGAT	19	GRCh38.p12	4	0	19	19	19	19
									D18S51	chr18	63281667	63281738	[AGAA]18	18	GRCh38.p12	4	0	18	18	18	18
									D22S1045	chr22	37140287	37140337	[ATT]14 ACT [ATT]2	17	GRCh38.p12	3	0	17	17	17	17
									DYS635	chrY	12258860	12258951	[TAGA]9 [TACA]2 [TAGA]2 [TACA]2 [TAGA]2 [TACA]2 [TAGA]4	23	GRCh38.p12	4	0	23	23	23	23
									DYS437	chrY	12346267	12346326	[TCTA]9 [TCTG]2 [TCTA]4	15	GRCh38.p12	4	0	15	15	15	15
									DYS438	chrY	12825889	12825948	[TTTTC]12	12	GRCh38.p12	5	0	12	12	12	12
									DYS390	chrY	15163067	15163162	[TAGA]4 CAGA [TAGA]11 [CAGA]8	24	GRCh38.p12	4	0	24	24	24	24
									DYS392	chrY	20471987	20472025	[ATA]13	13	GRCh38.p12	3	0	13	13	13	13
									DYS448	chrY	22218923	22219078	[AGAGAT]n=11 [atagag]2 [agatag]3 [atag]2 agaa [AGAGAT]n=8	19	GRCh38.p12	6	42	19	19	19	19
									DYS458	chrY	7999839	7999902	[GAAA]16	16	GRCh38.p12	4	0	16	16	16	16
Simulated_data-1	100000	799762580	17451454	9806620	11538173	0.0218208	0.0122619	0.014427	D12S391	chr12	12297020	12297095	[AGAT]11 [AGAC]7 AGAT	19	GRCh38.p12	4	0	19	19	19	19
									D18S51	chr18	63281667	63281738	[AGAA]18	18	GRCh38.p12	4	0	18	18	18	18
									D22S1045	chr22	37140287	37140337	[ATT]14 ACT [ATT]2	17	GRCh38.p12	3	0	17	17	17	17
									DYS635	chrY	12258860	12258951	[TAGA]9 [TACA]2 [TAGA]2 [TACA]2 [TAGA]2 [TACA]2 [TAGA]4	23	GRCh38.p12	4	0	23	23	23	23
									DYS437	chrY	12346267	12346326	[TCTA]9 [TCTG]2 [TCTA]4	15	GRCh38.p12	4	0	15	15	15	15
									DYS438	chrY	12825889	12825948	[TTTTC]12	12	GRCh38.p12	5	0	12	12	12	12
									DYS390	chrY	15163067	15163162	[TAGA]4 CAGA [TAGA]11 [CAGA]8	24	GRCh38.p12	4	0	24	24	24	24
									DYS392	chrY	20471987	20472025	[ATA]13	13	GRCh38.p12	3	0	13	13	13	13
									DYS448	chrY	22218923	22219078	[AGAGAT]n=11 [atagag]2 [agatag]3 [atag]2 agaa [AGAGAT]n=8	19	GRCh38.p12	6	42	19	19	19	19
									DYS458	chrY	7999839	7999902	[GAAA]16	16	GRCh38.p12	4	0	16	16	16	16
Simulated_data-1	100000	798253532	15844443	8904147	10463788	0.0198489	0.0111545	0.0131084	D12S391	chr12	12297020	12297095	[AGAT]11 [AGAC]7 AGAT	19	GRCh38.p12	4	0	19	19	19	19
									D18S51	chr18	63281667	63281738	[AGAA]18	18	GRCh38.p12	4	0	18	18	18	18
									D22S1045	chr22	37140287	37140337	[ATT]14 ACT [ATT]2	17	GRCh38.p12	3	0	17	17	17	17
									DYS635	chrY	12258860	12258951	[TAGA]9 [TACA]2 [TAGA]2 [TACA]2 [TAGA]2 [TACA]2 [TAGA]4	23	GRCh38.p12	4	0	23	23	23	23
									DYS437	chrY	12346267	12346326	[TCTA]9 [TCTG]2 [TCTA]4	15	GRCh38.p12	4	0	15	15	15	15
									DYS438	chrY	12825889	12825948	[TTTTC]12	12	GRCh38.p12	5	0	12	12	12	12
									DYS390	chrY	15163067	15163162	[TAGA]4 CAGA [TAGA]11 [CAGA]8	24	GRCh38.p12	4	0	24	24	24	24
									DYS392	chrY	20471987	20472025	[ATA]13	13	GRCh38.p12	3	0	13	13	13	13
									DYS448	chrY	22218923	22219078	[AGAGAT]n=11 [atagag]2 [agatag]3 [atag]2 agaa [AGAGAT]n=8	19	GRCh38.p12	6	42	19	19	19	19
									DYS458	chrY	7999839	7999902	[GAAA]16	16	GRCh38.p12	4	0	16	16	16	16
Simulated_data-1	100000	798382370	14281720	8022075	9425119	0.0178883	0.0100479	0.0118053	D12S391	chr12	12297020	12297095	[AGAT]11 [AGAC]7 AGAT	19	GRCh38.p12	4	0	19	19	19	19
									D18S51	chr18	63281667	63281738	[AGAA]18	18	GRCh38.p12	4	0	18	18	18	18
									D22S1045	chr22	37140287	37140337	[ATT]14 ACT [ATT]2	17	GRCh38.p12	3	0	17	17	17	17
									DYS635	chrY	12258860	12258951	[TAGA]9 [TACA]2 [TAGA]2 [TACA]2 [TAGA]2 [TACA]2 [TAGA]4	23	GRCh38.p12	4	0	23	23	23	23
									DYS437	chrY	12346267	12346326	[TCTA]9 [TCTG]2 [TCTA]4	15	GRCh38.p12	4	0	15	15	15	15
									DYS438	chrY	12825889	12825948	[TTTTC]12	12	GRCh38.p12	5	0	12	12	12	12
									DYS390	chrY	15163067	15163162	[TAGA]4 CAGA [TAGA]11 [CAGA]8	24	GRCh38.p12	4	0	24	24	24	24
									DYS392	chrY	20471987	20472025	[ATA]13	13	GRCh38.p12	3	0	13	13	13	13
									DYS448	chrY	22218923	22219078	[AGAGAT]n=11 [atagag]2 [agatag]3 [atag]2 agaa [AGAGAT]n=8	19	GRCh38.p12	6	42	19	19	19	19
									DYS458	chrY	7999839	7999902	[GAAA]16	16	GRCh38.p12	4	0	16	16	16	16
Simulated_data-1	100000	798534162	12681755	7127200	8373170	0.0158813	0.00892535	0.0104857	D12S391	chr12	12297020	12297095	[AGAT]11 [AGAC]7 AGAT	19	GRCh38.p12	4	0	19	19	19	19
									D18S51	chr18	63281667	63281738	[AGAA]18	18	GRCh38.p12	4	0	18	18	18	18
									D22S1045	chr22	37140287	37140337	[ATT]14 ACT [ATT]2	17	GRCh38.p12	3	0	17	17	17	17
									DYS635	chrY	12258860	12258951	[TAGA]9 [TACA]2 [TAGA]2 [TACA]2 [TAGA]2 [TACA]2 [TAGA]4	23	GRCh38.p12	4	0	23	23	23	23
									DYS437	chrY	12346267	12346326	[TCTA]9 [TCTG]2 [TCTA]4	15	GRCh38.p12	4	0	15	15	15	15
									DYS438	chrY	12825889	12825948	[TTTTC]12	12	GRCh38.p12	5	0	12	12	12	12
									DYS390	chrY	15163067	15163162	[TAGA]4 CAGA [TAGA]11 [CAGA]8	24	GRCh38.p12	4	0	24	24	24	24
									DYS392	chrY	20471987	20472025	[ATA]13	13	GRCh38.p12	3	0	13	13	13	13
									DYS448	chrY	22218923	22219078	[AGAGAT]n=11 [atagag]2 [agatag]3 [atag]2 agaa [AGAGAT]n=8	19	GRCh38.p12	6	42	19	19	19	19
									DYS458	chrY	7999839	7999902	[GAAA]16	16	GRCh38.p12	4	0	16	16	16	16
Simulated_data-1	100000	798294579	11062448	6217853	7302764	0.0138576	0.00778892	0.00914796	D12S391	chr12	12297020	12297095	[AGAT]11 [AGAC]7 AGAT	19	GRCh38.p12	4	0	19	19	19	19
									D18S51	chr18	63281667	63281738	[AGAA]18	18	GRCh38.p12	4	0	18	18	18	18
									D22S1045	chr22	37140287	37140337	[ATT]14 ACT [ATT]2	17	GRCh38.p12	3	0	17	17	17	17
									DYS635	chrY	12258860	12258951	[TAGA]9 [TACA]2 [TAGA]2 [TACA]2 [TAGA]2 [TACA]2 [TAGA]4	23	GRCh38.p12	4	0	23	23	23	23
									DYS437	chrY	12346267	12346326	[TCTA]9 [TCTG]2 [TCTA]4	15	GRCh38.p12	4	0	15	15	15	15
									DYS438	chrY	12825889	12825948	[TTTTC]12	12	GRCh38.p12	5	0	12	12	12	12
									DYS390	chrY	15163067	15163162	[TAGA]4 CAGA [TAGA]11 [CAGA]8	24	GRCh38.p12	4	0	24	24	24	24
									DYS392	chrY	20471987	20472025	[ATA]13	13	GRCh38.p12	3	0	13	13	13	13
									DYS448	chrY	22218923	22219078	[AGAGAT]n=11 [atagag]2 [agatag]3 [atag]2 agaa [AGAGAT]n=8	19	GRCh38.p12	6	42	19	19	19	19
									DYS458	chrY	7999839	7999902	[GAAA]16	16	GRCh38.p12	4	0	16	16	16	16
Simulated_data-1	100000	797582086	9475049	5328498	6255761	0.0118797	0.00668081	0.00784341	D12S391	chr12	12297020	12297095	[AGAT]11 [AGAC]7 AGAT	19	GRCh38.p12	4	0	19	19	19	19
									D18S51	chr18	63281667	63281738	[AGAA]18	18	GRCh38.p12	4	0	18	18	18	18
									D22S1045	chr22	37140287	37140337	[ATT]14 ACT [ATT]2	17	GRCh38.p12	3	0	17	17	17	17
									DYS635	chrY	12258860	12258951	[TAGA]9 [TACA]2 [TAGA]2 [TACA]2 [TAGA]2 [TACA]2 [TAGA]4	23	GRCh38.p12	4	0	23	23	23	23
									DYS437	chrY	12346267	12346326	[TCTA]9 [TCTG]2 [TCTA]4	15	GRCh38.p12	4	0	15	15	15	15
									DYS438	chrY	12825889	12825948	[TTTTC]12	12	GRCh38.p12	5	0	12	12	12	12
									DYS390	chrY	15163067	15163162	[TAGA]4 CAGA [TAGA]11 [CAGA]8	24	GRCh38.p12	4	0	24	24	24	24
									DYS392	chrY	20471987	20472025	[ATA]13	13	GRCh38.p12	3	0	13	13	13	13
									DYS448	chrY	22218923	22219078	[AGAGAT]n=11 [atagag]2 [agatag]3 [atag]2 agaa [AGAGAT]n=8	19	GRCh38.p12	6	42	19	19	19	19
									DYS458	chrY	7999839	7999902	[GAAA]16	16	GRCh38.p12	4	0	16	16	16	16
Simulated_data-1	100000	797396877	7899298	4443088	5214794	0.00990636	0.00557199	0.00653977	D12S391	chr12	12297020	12297095	[AGAT]11 [AGAC]7 AGAT	19	GRCh38.p12	4	0	19	19	19	19
									D18S51	chr18	63281667	63281738	[AGAA]18	18	GRCh38.p12	4	0	18	18	18	18
									D22S1045	chr22	37140287	37140337	[ATT]14 ACT [ATT]2	17	GRCh38.p12	3	0	17	17	17	17
									DYS635	chrY	12258860	12258951	[TAGA]9 [TACA]2 [TAGA]2 [TACA]2 [TAGA]2 [TACA]2 [TAGA]4	23	GRCh38.p12	4	0	23	23	23	23
									DYS437	chrY	12346267	12346326	[TCTA]9 [TCTG]2 [TCTA]4	15	GRCh38.p12	4	0	15	15	15	15
									DYS438	chrY	12825889	12825948	[TTTTC]12	12	GRCh38.p12	5	0	12	12	12	12
									DYS390	chrY	15163067	15163162	[TAGA]4 CAGA [TAGA]11 [CAGA]8	24	GRCh38.p12	4	0	24	24	24	24
									DYS392	chrY	20471987	20472025	[ATA]13	13	GRCh38.p12	3	0	13	13	13	13
									DYS448	chrY	22218923	22219078	[AGAGAT]n=11 [atagag]2 [agatag]3 [atag]2 agaa [AGAGAT]n=8	19	GRCh38.p12	6	42	19	19	19	19
									DYS458	chrY	7999839	7999902	[GAAA]16	16	GRCh38.p12	4	0	16	16	16	16
Simulated_data-1	100000	797193753	6333846	3558801	4179056	0.00794518	0.00446416	0.00524221	D12S391	chr12	12297020	12297095	[AGAT]11 [AGAC]7 AGAT	19	GRCh38.p12	4	0	19	19	19	19
									D18S51	chr18	63281667	63281738	[AGAA]18	18	GRCh38.p12	4	0	18	18	18	18
									D22S1045	chr22	37140287	37140337	[ATT]14 ACT [ATT]2	17	GRCh38.p12	3	0	17	17	17	17
									DYS635	chrY	12258860	12258951	[TAGA]9 [TACA]2 [TAGA]2 [TACA]2 [TAGA]2 [TACA]2 [TAGA]4	23	GRCh38.p12	4	0	23	23	23	23
									DYS437	chrY	12346267	12346326	[TCTA]9 [TCTG]2 [TCTA]4	15	GRCh38.p12	4	0	15	15	15	15
									DYS438	chrY	12825889	12825948	[TTTTC]12	12	GRCh38.p12	5	0	12	12	12	12
									DYS390	chrY	15163067	15163162	[TAGA]4 CAGA [TAGA]11 [CAGA]8	24	GRCh38.p12	4	0	24	24	24	24
									DYS392	chrY	20471987	20472025	[ATA]13	13	GRCh38.p12	3	0	13	13	13	13
									DYS448	chrY	22218923	22219078	[AGAGAT]n=11 [atagag]2 [agatag]3 [atag]2 agaa [AGAGAT]n=8	19	GRCh38.p12	6	42	19	19	19	19
									DYS458	chrY	7999839	7999902	[GAAA]16	16	GRCh38.p12	4	0	16	16	16	16
Simulated_data-1	100000	797641063	4764545	2677019	3146511	0.00597329	0.00335617	0.00394477	D12S391	chr12	12297020	12297095	[AGAT]11 [AGAC]7 AGAT	19	GRCh38.p12	4	0	19	19	19	19
									D18S51	chr18	63281667	63281738	[AGAA]18	18	GRCh38.p12	4	0	18	18	18	18
									D22S1045	chr22	37140287	37140337	[ATT]14 ACT [ATT]2	17	GRCh38.p12	3	0	17	17	17	17
									DYS635	chrY	12258860	12258951	[TAGA]9 [TACA]2 [TAGA]2 [TACA]2 [TAGA]2 [TACA]2 [TAGA]4	23	GRCh38.p12	4	0	23	23	23	23
									DYS437	chrY	12346267	12346326	[TCTA]9 [TCTG]2 [TCTA]4	15	GRCh38.p12	4	0	15	15	15	15
									DYS438	chrY	12825889	12825948	[TTTTC]12	12	GRCh38.p12	5	0	12	12	12	12
									DYS390	chrY	15163067	15163162	[TAGA]4 CAGA [TAGA]11 [CAGA]8	24	GRCh38.p12	4	0	24	24	24	24
									DYS392	chrY	20471987	20472025	[ATA]13	13	GRCh38.p12	3	0	13	13	13	13
									DYS448	chrY	22218923	22219078	[AGAGAT]n=11 [atagag]2 [agatag]3 [atag]2 agaa [AGAGAT]n=8	19	GRCh38.p12	6	42	19	19	19	19
									DYS458	chrY	7999839	7999902	[GAAA]16	16	GRCh38.p12	4	0	16	16	16	16
Simulated_data-1	100000	796097795	3172530	1782115	2092754	0.0039851	0.00223856	0.00262876	D12S391	chr12	12297020	12297095	[AGAT]11 [AGAC]7 AGAT	19	GRCh38.p12	4	0	19	19	19	19
									D18S51	chr18	63281667	63281738	[AGAA]18	18	GRCh38.p12	4	0	18	18	18	18
									D22S1045	chr22	37140287	37140337	[ATT]14 ACT [ATT]2	17	GRCh38.p12	3	0	17	17	17	17
									DYS635	chrY	12258860	12258951	[TAGA]9 [TACA]2 [TAGA]2 [TACA]2 [TAGA]2 [TACA]2 [TAGA]4	23	GRCh38.p12	4	0	23	23	23	23
									DYS437	chrY	12346267	12346326	[TCTA]9 [TCTG]2 [TCTA]4	15	GRCh38.p12	4	0	15	15	15	15
									DYS438	chrY	12825889	12825948	[TTTTC]12	12	GRCh38.p12	5	0	12	12	12	12
									DYS390	chrY	15163067	15163162	[TAGA]4 CAGA [TAGA]11 [CAGA]8	24	GRCh38.p12	4	0	24	24	24	24
									DYS392	chrY	20471987	20472025	[ATA]13	13	GRCh38.p12	3	0	13	13	13	13
									DYS448	chrY	22218923	22219078	[AGAGAT]n=11 [atagag]2 [agatag]3 [atag]2 agaa [AGAGAT]n=8	19	GRCh38.p12	6	42	19	19	19	19
									DYS458	chrY	7999839	7999902	[GAAA]16	16	GRCh38.p12	4	0	16	16	16	16
Simulated_data-1	100000	796471928	1589165	892670	1048931	0.00199526	0.00112078	0.00131697	D12S391	chr12	12297020	12297095	[AGAT]11 [AGAC]7 AGAT	19	GRCh38.p12	4	0	19	19	19	19
									D18S51	chr18	63281667	63281738	[AGAA]18	18	GRCh38.p12	4	0	18	18	18	18
									D22S1045	chr22	37140287	37140337	[ATT]14 ACT [ATT]2	17	GRCh38.p12	3	0	17	17	17	17
									DYS635	chrY	12258860	12258951	[TAGA]9 [TACA]2 [TAGA]2 [TACA]2 [TAGA]2 [TACA]2 [TAGA]4	23	GRCh38.p12	4	0	23	23	23	23
									DYS437	chrY	12346267	12346326	[TCTA]9 [TCTG]2 [TCTA]4	15	GRCh38.p12	4	0	15	15	15	15
									DYS438	chrY	12825889	12825948	[TTTTC]12	12	GRCh38.p12	5	0	12	12	12	12
									DYS390	chrY	15163067	15163162	[TAGA]4 CAGA [TAGA]11 [CAGA]8	24	GRCh38.p12	4	0	24	24	24	24
									DYS392	chrY	20471987	20472025	[ATA]13	13	GRCh38.p12	3	0	13	13	13	13
									DYS448	chrY	22218923	22219078	[AGAGAT]n=11 [atagag]2 [agatag]3 [atag]2 agaa [AGAGAT]n=8	19	GRCh38.p12	6	42	19	19	19	19
									DYS458	chrY	7999839	7999902	[GAAA]16	16	GRCh38.p12	4	0	16	16	16	16
Simulated_data-1	100000	773470496	29812205	16757830	19686236	0.0385434	0.0216658	0.0254518	D12S391	chr12	12297020	12297095	[AGAT]11 [AGAC]7 AGAT	19	GRCh38.p12	4	0	19	19	19	19
									D18S51	chr18	63281667	63281738	[AGAA]18	18	GRCh38.p12	4	0	18	18	18	18
									D22S1045	chr22	37140287	37140337	[ATT]14 ACT [ATT]2	17	GRCh38.p12	3	0	17	17	17	17
									DYS635	chrY	12258860	12258951	[TAGA]9 [TACA]2 [TAGA]2 [TACA]2 [TAGA]2 [TACA]2 [TAGA]4	23	GRCh38.p12	4	0	23	23	23	23
									DYS437	chrY	12346267	12346326	[TCTA]9 [TCTG]2 [TCTA]4	15	GRCh38.p12	4	0	15	15	15	15
									DYS438	chrY	12825889	12825948	[TTTTC]12	12	GRCh38.p12	5	0	12	12	12	12
									DYS390	chrY	15163067	15163162	[TAGA]4 CAGA [TAGA]11 [CAGA]8	24	GRCh38.p12	4	0	24	24	24	24
									DYS392	chrY	20471987	20472025	[ATA]13	13	GRCh38.p12	3	0	13	13	13	13
									DYS448	chrY	22218923	22219078	[AGAGAT]n=11 [atagag]2 [agatag]3 [atag]2 agaa [AGAGAT]n=8	19	GRCh38.p12	6	42	19	19	19	19
									DYS458	chrY	7999839	7999902	[GAAA]16	16	GRCh38.p12	4	0	16	16	16	16
Simulated_data-2	100000	795887101	0	0	0	0	0	0	D12S391	chr12	12297020	12297095	[AGAT]11 [AGAC]7 AGAT	19	GRCh38.p12	4	0	19	23	19	23
									D18S51	chr18	63281667	63281738	[AGAA]18	18	GRCh38.p12	4	0	18	22	18	22
									D22S1045	chr22	37140287	37140337	[ATT]14 ACT [ATT]2	17	GRCh38.p12	3	0	17	21	17	21
									DYS635	chrY	12258860	12258951	[TAGA]9 [TACA]2 [TAGA]2 [TACA]2 [TAGA]2 [TACA]2 [TAGA]4	23	GRCh38.p12	4	0	23	27	23	27
									DYS437	chrY	12346267	12346326	[TCTA]9 [TCTG]2 [TCTA]4	15	GRCh38.p12	4	0	15	19	15	19
									DYS438	chrY	12825889	12825948	[TTTTC]12	12	GRCh38.p12	5	0	12	16	12	16
									DYS390	chrY	15163067	15163162	[TAGA]4 CAGA [TAGA]11 [CAGA]8	24	GRCh38.p12	4	0	24	28	24	28
									DYS392	chrY	20471987	20472025	[ATA]13	13	GRCh38.p12	3	0	13	17	13	17
									DYS448	chrY	22218923	22219078	[AGAGAT]n=11 [atagag]2 [agatag]3 [atag]2 agaa [AGAGAT]n=8	19	GRCh38.p12	6	42	19	23	19	19
									DYS458	chrY	7999839	7999902	[GAAA]16	16	GRCh38.p12	4	0	16	20	16	20
Simulated_data-2	100000	804393144	30159239	16955092	19921945	0.0374932	0.0210781	0.0247664	D12S391	chr12	12297020	12297095	[AGAT]11 [AGAC]7 AGAT	19	GRCh38.p12	4	0	19	23	19	23
									D18S51	chr18	63281667	63281738	[AGAA]18	18	GRCh38.p12	4	0	18	22	18	18
									D22S1045	chr22	37140287	37140337	[ATT]14 ACT [ATT]2	17	GRCh38.p12	3	0	17	21	17	21
									DYS635	chrY	12258860	12258951	[TAGA]9 [TACA]2 [TAGA]2 [TACA]2 [TAGA]2 [TACA]2 [TAGA]4	23	GRCh38.p12	4	0	23	27	23	27
									DYS437	chrY	12346267	12346326	[TCTA]9 [TCTG]2 [TCTA]4	15	GRCh38.p12	4	0	15	19	15	19
									DYS438	chrY	12825889	12825948	[TTTTC]12	12	GRCh38.p12	5	0	12	16	12	16
									DYS390	chrY	15163067	15163162	[TAGA]4 CAGA [TAGA]11 [CAGA]8	24	GRCh38.p12	4	0	24	28	24	28
									DYS392	chrY	20471987	20472025	[ATA]13	13	GRCh38.p12	3	0	13	17	13	17
									DYS448	chrY	22218923	22219078	[AGAGAT]n=11 [atagag]2 [agatag]3 [atag]2 agaa [AGAGAT]n=8	19	GRCh38.p12	6	42	19	23	19	19
									DYS458	chrY	7999839	7999902	[GAAA]16	16	GRCh38.p12	4	0	16	20	16	20
Simulated_data-2	100000	802922876	28589660	16071942	18884476	0.035607	0.0200168	0.0235197	D12S391	chr12	12297020	12297095	[AGAT]11 [AGAC]7 AGAT	19	GRCh38.p12	4	0	19	23	19	23
									D18S51	chr18	63281667	63281738	[AGAA]18	18	GRCh38.p12	4	0	18	22	18	22
									D22S1045	chr22	37140287	37140337	[ATT]14 ACT [ATT]2	17	GRCh38.p12	3	0	17	21	17	21
									DYS635	chrY	12258860	12258951	[TAGA]9 [TACA]2 [TAGA]2 [TACA]2 [TAGA]2 [TACA]2 [TAGA]4	23	GRCh38.p12	4	0	23	27	23	27
									DYS437	chrY	12346267	12346326	[TCTA]9 [TCTG]2 [TCTA]4	15	GRCh38.p12	4	0	15	19	15	15
									DYS438	chrY	12825889	12825948	[TTTTC]12	12	GRCh38.p12	5	0	12	16	12	16
									DYS390	chrY	15163067	15163162	[TAGA]4 CAGA [TAGA]11 [CAGA]8	24	GRCh38.p12	4	0	24	28	24	28
									DYS392	chrY	20471987	20472025	[ATA]13	13	GRCh38.p12	3	0	13	17	13	17
									DYS448	chrY	22218923	22219078	[AGAGAT]n=11 [atagag]2 [agatag]3 [atag]2 agaa [AGAGAT]n=8	19	GRCh38.p12	6	42	19	23	19	19
									DYS458	chrY	7999839	7999902	[GAAA]16	16	GRCh38.p12	4	0	16	20	16	20
Simulated_data-2	100000	802229607	26963057	15158144	17807168	0.0336101	0.018895	0.0221971	D12S391	chr12	12297020	12297095	[AGAT]11 [AGAC]7 AGAT	19	GRCh38.p12	4	0	19	23	19	23
									D18S51	chr18	63281667	63281738	[AGAA]18	18	GRCh38.p12	4	0	18	22	18	22
									D22S1045	chr22	37140287	37140337	[ATT]14 ACT [ATT]2	17	GRCh38.p12	3	0	17	21	17	21
									DYS635	chrY	12258860	12258951	[TAGA]9 [TACA]2 [TAGA]2 [TACA]2 [TAGA]2 [TACA]2 [TAGA]4	23	GRCh38.p12	4	0	23	27	23	27
									DYS437	chrY	12346267	12346326	[TCTA]9 [TCTG]2 [TCTA]4	15	GRCh38.p12	4	0	15	19	15	15
									DYS438	chrY	12825889	12825948	[TTTTC]12	12	GRCh38.p12	5	0	12	16	12	16
									DYS390	chrY	15163067	15163162	[TAGA]4 CAGA [TAGA]11 [CAGA]8	24	GRCh38.p12	4	0	24	28	24	28
									DYS392	chrY	20471987	20472025	[ATA]13	13	GRCh38.p12	3	0	13	17	13	17
									DYS448	chrY	22218923	22219078	[AGAGAT]n=11 [atagag]2 [agatag]3 [atag]2 agaa [AGAGAT]n=8	19	GRCh38.p12	6	42	19	23	19	19
									DYS458	chrY	7999839	7999902	[GAAA]16	16	GRCh38.p12	4	0	16	20	16	20
Simulated_data-2	100000	800844107	25358857	14250961	16750089	0.0316652	0.0177949	0.0209155	D12S391	chr12	12297020	12297095	[AGAT]11 [AGAC]7 AGAT	19	GRCh38.p12	4	0	19	23	19	23
									D18S51	chr18	63281667	63281738	[AGAA]18	18	GRCh38.p12	4	0	18	22	18	22
									D22S1045	chr22	37140287	37140337	[ATT]14 ACT [ATT]2	17	GRCh38.p12	3	0	17	21	17	21
									DYS635	chrY	12258860	12258951	[TAGA]9 [TACA]2 [TAGA]2 [TACA]2 [TAGA]2 [TACA]2 [TAGA]4	23	GRCh38.p12	4	0	23	27	23	27
									DYS437	chrY	12346267	12346326	[TCTA]9 [TCTG]2 [TCTA]4	15	GRCh38.p12	4	0	15	19	15	15
									DYS438	chrY	12825889	12825948	[TTTTC]12	12	GRCh38.p12	5	0	12	16	12	16
									DYS390	chrY	15163067	15163162	[TAGA]4 CAGA [TAGA]11 [CAGA]8	24	GRCh38.p12	4	0	24	28	24	28
									DYS392	chrY	20471987	20472025	[ATA]13	13	GRCh38.p12	3	0	13	17	13	17
									DYS448	chrY	22218923	22219078	[AGAGAT]n=11 [atagag]2 [agatag]3 [atag]2 agaa [AGAGAT]n=8	19	GRCh38.p12	6	42	19	23	19	19
									DYS458	chrY	7999839	7999902	[GAAA]16	16	GRCh38.p12	4	0	16	20	16	20
Simulated_data-2	100000	799204083	23712753	13327733	15658922	0.0296705	0.0166763	0.0195931	D12S391	chr12	12297020	12297095	[AGAT]11 [AGAC]7 AGAT	19	GRCh38.p12	4	0	19	23	19	23
									D18S51	chr18	63281667	63281738	[AGAA]18	18	GRCh38.p12	4	0	18	22	18	22
									D22S1045	chr22	37140287	37140337	[ATT]14 ACT [ATT]2	17	GRCh38.p12	3	0	17	21	17	21
									DYS635	chrY	12258860	12258951	[TAGA]9 [TACA]2 [TAGA]2 [TACA]2 [TAGA]2 [TACA]2 [TAGA]4	23	GRCh38.p12	4	0	23	27	23	27
									DYS437	chrY	12346267	12346326	[TCTA]9 [TCTG]2 [TCTA]4	15	GRCh38.p12	4	0	15	19	15	15
									DYS438	chrY	12825889	12825948	[TTTTC]12	12	GRCh38.p12	5	0	12	16	12	16
									DYS390	chrY	15163067	15163162	[TAGA]4 CAGA [TAGA]11 [CAGA]8	24	GRCh38.p12	4	0	24	28	24	28
									DYS392	chrY	20471987	20472025	[ATA]13	13	GRCh38.p12	3	0	13	17	13	17
									DYS448	chrY	22218923	22219078	[AGAGAT]n=11 [atagag]2 [agatag]3 [atag]2 agaa [AGAGAT]n=8	19	GRCh38.p12	6	42	19	23	19	19
									DYS458	chrY	7999839	7999902	[GAAA]16	16	GRCh38.p12	4	0	16	20	16	20
Simulated_data-2	100000	798882482	22123412	12435775	14614920	0.0276929	0.0155665	0.0182942	D12S391	chr12	12297020	12297095	[AGAT]11 [AGAC]7 AGAT	19	GRCh38.p12	4	0	19	23	19	23
									D18S51	chr18	63281667	63281738	[AGAA]18	18	GRCh38.p12	4	0	18	22	18	22
									D22S1045	chr22	37140287	37140337	[ATT]14 ACT [ATT]2	17	GRCh38.p12	3	0	17	21	17	21
									DYS635	chrY	12258860	12258951	[TAGA]9 [TACA]2 [TAGA]2 [TACA]2 [TAGA]2 [TACA]2 [TAGA]4	23	GRCh38.p12	4	0	23	27	23	27
									DYS437	chrY	12346267	12346326	[TCTA]9 [TCTG]2 [TCTA]4	15	GRCh38.p12	4	0	15	19	15	19
									DYS438	chrY	12825889	12825948	[TTTTC]12	12	GRCh38.p12	5	0	12	16	12	16
									DYS390	chrY	15163067	15163162	[TAGA]4 CAGA [TAGA]11 [CAGA]8	24	GRCh38.p12	4	0	24	28	24	28
									DYS392	chrY	20471987	20472025	[ATA]13	13	GRCh38.p12	3	0	13	17	13	17
									DYS448	chrY	22218923	22219078	[AGAGAT]n=11 [atagag]2 [agatag]3 [atag]2 agaa [AGAGAT]n=8	19	GRCh38.p12	6	42	19	23	19	19
									DYS458	chrY	7999839	7999902	[GAAA]16	16	GRCh38.p12	4	0	16	20	16	20
Simulated_data-2	100000	800978467	20670241	11620116	13650836	0.0258062	0.0145074	0.0170427	D12S391	chr12	12297020	12297095	[AGAT]11 [AGAC]7 AGAT	19	GRCh38.p12	4	0	19	23	19	23
									D18S51	chr18	63281667	63281738	[AGAA]18	18	GRCh38.p12	4	0	18	22	18	22
									D22S1045	chr22	37140287	37140337	[ATT]14 ACT [ATT]2	17	GRCh38.p12	3	0	17	21	17	21
									DYS635	chrY	12258860	12258951	[TAGA]9 [TACA]2 [TAGA]2 [TACA]2 [TAGA]2 [TACA]2 [TAGA]4	23	GRCh38.p12	4	0	23	27	23	27
									DYS437	chrY	12346267	12346326	[TCTA]9 [TCTG]2 [TCTA]4	15	GRCh38.p12	4	0	15	19	15	19
									DYS438	chrY	12825889	12825948	[TTTTC]12	12	GRCh38.p12	5	0	12	16	12	16
									DYS390	chrY	15163067	15163162	[TAGA]4 CAGA [TAGA]11 [CAGA]8	24	GRCh38.p12	4	0	24	28	24	28
									DYS392	chrY	20471987	20472025	[ATA]13	13	GRCh38.p12	3	0	13	17	13	17
									DYS448	chrY	22218923	22219078	[AGAGAT]n=11 [atagag]2 [agatag]3 [atag]2 agaa [AGAGAT]n=8	19	GRCh38.p12	6	42	19	23	19	19
									DYS458	chrY	7999839	7999902	[GAAA]16	16	GRCh38.p12	4	0	16	20	16	20
Simulated_data-2	100000	799402528	19010836	10681338	12548609	0.0237813	0.0133617	0.0156975	D12S391	chr12	12297020	12297095	[AGAT]11 [AGAC]7 AGAT	19	GRCh38.p12	4	0	19	23	19	23
									D18S51	chr18	63281667	63281738	[AGAA]18	18	GRCh38.p12	4	0	18	22	18	22
									D22S1045	chr22	37140287	37140337	[ATT]14 ACT [ATT]2	17	GRCh38.p12	3	0	17	21	17	21
									DYS635	chrY	12258860	12258951	[TAGA]9 [TACA]2 [TAGA]2 [TACA]2 [TAGA]2 [TACA]2 [TAGA]4	23	GRCh38.p12	4	0	23	27	23	27
									DYS437	chrY	12346267	12346326	[TCTA]9 [TCTG]2 [TCTA]4	15	GRCh38.p12	4	0	15	19	15	15
									DYS438	chrY	12825889	12825948	[TTTTC]12	12	GRCh38.p12	5	0	12	16	12	16
									DYS390	chrY	15163067	15163162	[TAGA]4 CAGA [TAGA]11 [CAGA]8	24	GRCh38.p12	4	0	24	28	24	28
									DYS392	chrY	20471987	20472025	[ATA]13	13	GRCh38.p12	3	0	13	17	13	17
									DYS448	chrY	22218923	22219078	[AGAGAT]n=11 [atagag]2 [agatag]3 [atag]2 agaa [AGAGAT]n=8	19	GRCh38.p12	6	42	19	23	19	19
									DYS458	chrY	7999839	7999902	[GAAA]16	16	GRCh38.p12	4	0	16	20	16	20
Simulated_data-2	100000	798963928	17442748	9802625	11520710	0.0218317	0.0122692	0.0144196	D12S391	chr12	12297020	12297095	[AGAT]11 [AGAC]7 AGAT	19	GRCh38.p12	4	0	19	23	19	23
									D18S51	chr18	63281667	63281738	[AGAA]18	18	GRCh38.p12	4	0	18	22	18	22
									D22S1045	chr22	37140287	37140337	[ATT]14 ACT [ATT]2	17	GRCh38.p12	3	0	17	21	17	21
									DYS635	chrY	12258860	12258951	[TAGA]9 [TACA]2 [TAGA]2 [TACA]2 [TAGA]2 [TACA]2 [TAGA]4	23	GRCh38.p12	4	0	23	27	23	27
									DYS437	chrY	12346267	12346326	[TCTA]9 [TCTG]2 [TCTA]4	15	GRCh38.p12	4	0	15	19	15	15
									DYS438	chrY	12825889	12825948	[TTTTC]12	12	GRCh38.p12	5	0	12	16	12	16
									DYS390	chrY	15163067	15163162	[TAGA]4 CAGA [TAGA]11 [CAGA]8	24	GRCh38.p12	4	0	24	28	24	28
									DYS392	chrY	20471987	20472025	[ATA]13	13	GRCh38.p12	3	0	13	17	13	17
									DYS448	chrY	22218923	22219078	[AGAGAT]n=11 [atagag]2 [agatag]3 [atag]2 agaa [AGAGAT]n=8	19	GRCh38.p12	6	42	19	23	19	19
									DYS458	chrY	7999839	7999902	[GAAA]16	16	GRCh38.p12	4	0	16	20	16	20
Simulated_data-2	100000	796911296	15812969	8888550	10447539	0.0198428	0.0111538	0.01311	D12S391	chr12	12297020	12297095	[AGAT]11 [AGAC]7 AGAT	19	GRCh38.p12	4	0	19	23	19	23
									D18S51	chr18	63281667	63281738	[AGAA]18	18	GRCh38.p12	4	0	18	22	18	22
									D22S1045	chr22	37140287	37140337	[ATT]14 ACT [ATT]2	17	GRCh38.p12	3	0	17	21	17	21
									DYS635	chrY	12258860	12258951	[TAGA]9 [TACA]2 [TAGA]2 [TACA]2 [TAGA]2 [TACA]2 [TAGA]4	23	GRCh38.p12	4	0	23	27	23	27
									DYS437	chrY	12346267	12346326	[TCTA]9 [TCTG]2 [TCTA]4	15	GRCh38.p12	4	0	15	19	15	15
									DYS438	chrY	12825889	12825948	[TTTTC]12	12	GRCh38.p12	5	0	12	16	12	16
									DYS390	chrY	15163067	15163162	[TAGA]4 CAGA [TAGA]11 [CAGA]8	24	GRCh38.p12	4	0	24	28	24	28
									DYS392	chrY	20471987	20472025	[ATA]13	13	GRCh38.p12	3	0	13	17	13	17
									DYS448	chrY	22218923	22219078	[AGAGAT]n=11 [atagag]2 [agatag]3 [atag]2 agaa [AGAGAT]n=8	19	GRCh38.p12	6	42	19	23	19	19
									DYS458	chrY	7999839	7999902	[GAAA]16	16	GRCh38.p12	4	0	16	20	16	20
Simulated_data-2	100000	798824803	14306631	8039683	9448730	0.0179096	0.0100644	0.0118283	D12S391	chr12	12297020	12297095	[AGAT]11 [AGAC]7 AGAT	19	GRCh38.p12	4	0	19	23	19	23
									D18S51	chr18	63281667	63281738	[AGAA]18	18	GRCh38.p12	4	0	18	22	18	22
									D22S1045	chr22	37140287	37140337	[ATT]14 ACT [ATT]2	17	GRCh38.p12	3	0	17	21	17	21
									DYS635	chrY	12258860	12258951	[TAGA]9 [TACA]2 [TAGA]2 [TACA]2 [TAGA]2 [TACA]2 [TAGA]4	23	GRCh38.p12	4	0	23	27	23	27
									DYS437	chrY	12346267	12346326	[TCTA]9 [TCTG]2 [TCTA]4	15	GRCh38.p12	4	0	15	19	15	15
									DYS438	chrY	12825889	12825948	[TTTTC]12	12	GRCh38.p12	5	0	12	16	12	16
									DYS390	chrY	15163067	15163162	[TAGA]4 CAGA [TAGA]11 [CAGA]8	24	GRCh38.p12	4	0	24	28	24	28
									DYS392	chrY	20471987	20472025	[ATA]13	13	GRCh38.p12	3	0	13	17	13	17
									DYS448	chrY	22218923	22219078	[AGAGAT]n=11 [atagag]2 [agatag]3 [atag]2 agaa [AGAGAT]n=8	19	GRCh38.p12	6	42	19	23	19	19
									DYS458	chrY	7999839	7999902	[GAAA]16	16	GRCh38.p12	4	0	16	20	16	20
Simulated_data-2	100000	798603757	12696083	7134390	8382498	0.0158979	0.00893358	0.0104964	D12S391	chr12	12297020	12297095	[AGAT]11 [AGAC]7 AGAT	19	GRCh38.p12	4	0	19	23	19	23
									D18S51	chr18	63281667	63281738	[AGAA]18	18	GRCh38.p12	4	0	18	22	18	22
									D22S1045	chr22	37140287	37140337	[ATT]14 ACT [ATT]2	17	GRCh38.p12	3	0	17	21	17	21
									DYS635	chrY	12258860	12258951	[TAGA]9 [TACA]2 [TAGA]2 [TACA]2 [TAGA]2 [TACA]2 [TAGA]4	23	GRCh38.p12	4	0	23	27	23	27
									DYS437	chrY	12346267	12346326	[TCTA]9 [TCTG]2 [TCTA]4	15	GRCh38.p12	4	0	15	19	15	15
									DYS438	chrY	12825889	12825948	[TTTTC]12	12	GRCh38.p12	5	0	12	16	12	16
									DYS390	chrY	15163067	15163162	[TAGA]4 CAGA [TAGA]11 [CAGA]8	24	GRCh38.p12	4	0	24	28	24	28
									DYS392	chrY	20471987	20472025	[ATA]13	13	GRCh38.p12	3	0	13	17	13	17
									DYS448	chrY	22218923	22219078	[AGAGAT]n=11 [atagag]2 [agatag]3 [atag]2 agaa [AGAGAT]n=8	19	GRCh38.p12	6	42	19	23	19	19
									DYS458	chrY	7999839	7999902	[GAAA]16	16	GRCh38.p12	4	0	16	20	16	20
Simulated_data-2	100000	799301639	11172800	6278887	7374238	0.0139782	0.00785547	0.00922585	D12S391	chr12	12297020	12297095	[AGAT]11 [AGAC]7 AGAT	19	GRCh38.p12	4	0	19	23	19	23
									D18S51	chr18	63281667	63281738	[AGAA]18	18	GRCh38.p12	4	0	18	22	18	22
									D22S1045	chr22	37140287	37140337	[ATT]14 ACT [ATT]2	17	GRCh38.p12	3	0	17	21	17	21
									DYS635	chrY	12258860	12258951	[TAGA]9 [TACA]2 [TAGA]2 [TACA]2 [TAGA]2 [TACA]2 [TAGA]4	23	GRCh38.p12	4	0	23	27	23	27
									DYS437	chrY	12346267	12346326	[TCTA]9 [TCTG]2 [TCTA]4	15	GRCh38.p12	4	0	15	19	15	19
									DYS438	chrY	12825889	12825948	[TTTTC]12	12	GRCh38.p12	5	0	12	16	12	16
									DYS390	chrY	15163067	15163162	[TAGA]4 CAGA [TAGA]11 [CAGA]8	24	GRCh38.p12	4	0	24	28	24	28
									DYS392	chrY	20471987	20472025	[ATA]13	13	GRCh38.p12	3	0	13	17	13	17
									DYS448	chrY	22218923	22219078	[AGAGAT]n=11 [atagag]2 [agatag]3 [atag]2 agaa [AGAGAT]n=8	19	GRCh38.p12	6	42	19	23	19	19
									DYS458	chrY	7999839	7999902	[GAAA]16	16	GRCh38.p12	4	0	16	20	16	20
Simulated_data-2	100000	797957208	9534265	5360180	6293567	0.0119483	0.00671738	0.0078871	D12S391	chr12	12297020	12297095	[AGAT]11 [AGAC]7 AGAT	19	GRCh38.p12	4	0	19	23	19	23
									D18S51	chr18	63281667	63281738	[AGAA]18	18	GRCh38.p12	4	0	18	22	18	22
									D22S1045	chr22	37140287	37140337	[ATT]14 ACT [ATT]2	17	GRCh38.p12	3	0	17	21	17	21
									DYS635	chrY	12258860	12258951	[TAGA]9 [TACA]2 [TAGA]2 [TACA]2 [TAGA]2 [TACA]2 [TAGA]4	23	GRCh38.p12	4	0	23	27	23	27
									DYS437	chrY	12346267	12346326	[TCTA]9 [TCTG]2 [TCTA]4	15	GRCh38.p12	4	0	15	19	15	19
									DYS438	chrY	12825889	12825948	[TTTTC]12	12	GRCh38.p12	5	0	12	16	12	16
									DYS390	chrY	15163067	15163162	[TAGA]4 CAGA [TAGA]11 [CAGA]8	24	GRCh38.p12	4	0	24	28	24	28
									DYS392	chrY	20471987	20472025	[ATA]13	13	GRCh38.p12	3	0	13	17	13	17
									DYS448	chrY	22218923	22219078	[AGAGAT]n=11 [atagag]2 [agatag]3 [atag]2 agaa [AGAGAT]n=8	19	GRCh38.p12	6	42	19	23	19	19
									DYS458	chrY	7999839	7999902	[GAAA]16	16	GRCh38.p12	4	0	16	20	16	20
Simulated_data-2	100000	797525234	7922062	4455144	5228541	0.00993331	0.00558621	0.00655596	D12S391	chr12	12297020	12297095	[AGAT]11 [AGAC]7 AGAT	19	GRCh38.p12	4	0	19	23	19	23
									D18S51	chr18	63281667	63281738	[AGAA]18	18	GRCh38.p12	4	0	18	22	18	22
									D22S1045	chr22	37140287	37140337	[ATT]14 ACT [ATT]2	17	GRCh38.p12	3	0	17	21	17	21
									DYS635	chrY	12258860	12258951	[TAGA]9 [TACA]2 [TAGA]2 [TACA]2 [TAGA]2 [TACA]2 [TAGA]4	23	GRCh38.p12	4	0	23	27	23	27
									DYS437	chrY	12346267	12346326	[TCTA]9 [TCTG]2 [TCTA]4	15	GRCh38.p12	4	0	15	19	15	19
									DYS438	chrY	12825889	12825948	[TTTTC]12	12	GRCh38.p12	5	0	12	16	12	16
									DYS390	chrY	15163067	15163162	[TAGA]4 CAGA [TAGA]11 [CAGA]8	24	GRCh38.p12	4	0	24	28	24	28
									DYS392	chrY	20471987	20472025	[ATA]13	13	GRCh38.p12	3	0	13	17	13	17
									DYS448	chrY	22218923	22219078	[AGAGAT]n=11 [atagag]2 [agatag]3 [atag]2 agaa [AGAGAT]n=8	19	GRCh38.p12	6	42	19	23	19	19
									DYS458	chrY	7999839	7999902	[GAAA]16	16	GRCh38.p12	4	0	16	20	16	20
Simulated_data-2	100000	797203603	6360842	3576865	4196127	0.00797894	0.00448676	0.00526356	D12S391	chr12	12297020	12297095	[AGAT]11 [AGAC]7 AGAT	19	GRCh38.p12	4	0	19	23	19	23
									D18S51	chr18	63281667	63281738	[AGAA]18	18	GRCh38.p12	4	0	18	22	18	22
									D22S1045	chr22	37140287	37140337	[ATT]14 ACT [ATT]2	17	GRCh38.p12	3	0	17	21	17	21
									DYS635	chrY	12258860	12258951	[TAGA]9 [TACA]2 [TAGA]2 [TACA]2 [TAGA]2 [TACA]2 [TAGA]4	23	GRCh38.p12	4	0	23	27	23	27
									DYS437	chrY	12346267	12346326	[TCTA]9 [TCTG]2 [TCTA]4	15	GRCh38.p12	4	0	15	19	15	19
									DYS438	chrY	12825889	12825948	[TTTTC]12	12	GRCh38.p12	5	0	12	16	12	16
									DYS390	chrY	15163067	15163162	[TAGA]4 CAGA [TAGA]11 [CAGA]8	24	GRCh38.p12	4	0	24	28	24	28
									DYS392	chrY	20471987	20472025	[ATA]13	13	GRCh38.p12	3	0	13	17	13	17
									DYS448	chrY	22218923	22219078	[AGAGAT]n=11 [atagag]2 [agatag]3 [atag]2 agaa [AGAGAT]n=8	19	GRCh38.p12	6	42	19	23	19	19
									DYS458	chrY	7999839	7999902	[GAAA]16	16	GRCh38.p12	4	0	16	20	16	20
Simulated_data-2	100000	798268172	4806056	2701607	3173405	0.0060206	0.00338434	0.00397536	D12S391	chr12	12297020	12297095	[AGAT]11 [AGAC]7 AGAT	19	GRCh38.p12	4	0	19	23	19	23
									D18S51	chr18	63281667	63281738	[AGAA]18	18	GRCh38.p12	4	0	18	22	18	22
									D22S1045	chr22	37140287	37140337	[ATT]14 ACT [ATT]2	17	GRCh38.p12	3	0	17	21	17	21
									DYS635	chrY	12258860	12258951	[TAGA]9 [TACA]2 [TAGA]2 [TACA]2 [TAGA]2 [TACA]2 [TAGA]4	23	GRCh38.p12	4	0	23	27	23	27
									DYS437	chrY	12346267	12346326	[TCTA]9 [TCTG]2 [TCTA]4	15	GRCh38.p12	4	0	15	19	15	19
									DYS438	chrY	12825889	12825948	[TTTTC]12	12	GRCh38.p12	5	0	12	16	12	16
									DYS390	chrY	15163067	15163162	[TAGA]4 CAGA [TAGA]11 [CAGA]8	24	GRCh38.p12	4	0	24	28	24	28
									DYS392	chrY	20471987	20472025	[ATA]13	13	GRCh38.p12	3	0	13	17	13	17
									DYS448	chrY	22218923	22219078	[AGAGAT]n=11 [atagag]2 [agatag]3 [atag]2 agaa [AGAGAT]n=8	19	GRCh38.p12	6	42	19	23	19	19
									DYS458	chrY	7999839	7999902	[GAAA]16	16	GRCh38.p12	4	0	16	20	16	20
Simulated_data-2	100000	796741359	3185164	1789921	2100035	0.00399774	0.00224655	0.00263578	D12S391	chr12	12297020	12297095	[AGAT]11 [AGAC]7 AGAT	19	GRCh38.p12	4	0	19	23	19	23
									D18S51	chr18	63281667	63281738	[AGAA]18	18	GRCh38.p12	4	0	18	22	18	22
									D22S1045	chr22	37140287	37140337	[ATT]14 ACT [ATT]2	17	GRCh38.p12	3	0	17	21	17	21
									DYS635	chrY	12258860	12258951	[TAGA]9 [TACA]2 [TAGA]2 [TACA]2 [TAGA]2 [TACA]2 [TAGA]4	23	GRCh38.p12	4	0	23	27	23	27
									DYS437	chrY	12346267	12346326	[TCTA]9 [TCTG]2 [TCTA]4	15	GRCh38.p12	4	0	15	19	15	19
									DYS438	chrY	12825889	12825948	[TTTTC]12	12	GRCh38.p12	5	0	12	16	12	16
									DYS390	chrY	15163067	15163162	[TAGA]4 CAGA [TAGA]11 [CAGA]8	24	GRCh38.p12	4	0	24	28	24	28
									DYS392	chrY	20471987	20472025	[ATA]13	13	GRCh38.p12	3	0	13	17	13	17
									DYS448	chrY	22218923	22219078	[AGAGAT]n=11 [atagag]2 [agatag]3 [atag]2 agaa [AGAGAT]n=8	19	GRCh38.p12	6	42	19	23	19	19
									DYS458	chrY	7999839	7999902	[GAAA]16	16	GRCh38.p12	4	0	16	20	16	20
Simulated_data-2	100000	796290751	1578624	885744	1042528	0.00198247	0.00111234	0.00130923	D12S391	chr12	12297020	12297095	[AGAT]11 [AGAC]7 AGAT	19	GRCh38.p12	4	0	19	23	19	23
									D18S51	chr18	63281667	63281738	[AGAA]18	18	GRCh38.p12	4	0	18	22	18	22
									D22S1045	chr22	37140287	37140337	[ATT]14 ACT [ATT]2	17	GRCh38.p12	3	0	17	21	17	21
									DYS635	chrY	12258860	12258951	[TAGA]9 [TACA]2 [TAGA]2 [TACA]2 [TAGA]2 [TACA]2 [TAGA]4	23	GRCh38.p12	4	0	23	27	23	27
									DYS437	chrY	12346267	12346326	[TCTA]9 [TCTG]2 [TCTA]4	15	GRCh38.p12	4	0	15	19	15	19
									DYS438	chrY	12825889	12825948	[TTTTC]12	12	GRCh38.p12	5	0	12	16	12	16
									DYS390	chrY	15163067	15163162	[TAGA]4 CAGA [TAGA]11 [CAGA]8	24	GRCh38.p12	4	0	24	28	24	28
									DYS392	chrY	20471987	20472025	[ATA]13	13	GRCh38.p12	3	0	13	17	13	17
									DYS448	chrY	22218923	22219078	[AGAGAT]n=11 [atagag]2 [agatag]3 [atag]2 agaa [AGAGAT]n=8	19	GRCh38.p12	6	42	19	23	19	19
									DYS458	chrY	7999839	7999902	[GAAA]16	16	GRCh38.p12	4	0	16	20	16	20
Simulated_data-2	100000	775175036	29921447	16825729	19748239	0.0385996	0.0217057	0.0254758	D12S391	chr12	12297020	12297095	[AGAT]11 [AGAC]7 AGAT	19	GRCh38.p12	4	0	19	23	19	19
									D18S51	chr18	63281667	63281738	[AGAA]18	18	GRCh38.p12	4	0	18	22	18	18
									D22S1045	chr22	37140287	37140337	[ATT]14 ACT [ATT]2	17	GRCh38.p12	3	0	17	21	17	17
									DYS635	chrY	12258860	12258951	[TAGA]9 [TACA]2 [TAGA]2 [TACA]2 [TAGA]2 [TACA]2 [TAGA]4	23	GRCh38.p12	4	0	23	27	23	23
									DYS437	chrY	12346267	12346326	[TCTA]9 [TCTG]2 [TCTA]4	15	GRCh38.p12	4	0	15	19	15	15
									DYS438	chrY	12825889	12825948	[TTTTC]12	12	GRCh38.p12	5	0	12	16	12	15
									DYS390	chrY	15163067	15163162	[TAGA]4 CAGA [TAGA]11 [CAGA]8	24	GRCh38.p12	4	0	24	28	24	24
									DYS392	chrY	20471987	20472025	[ATA]13	13	GRCh38.p12	3	0	13	17	13	16
									DYS448	chrY	22218923	22219078	[AGAGAT]n=11 [atagag]2 [agatag]3 [atag]2 agaa [AGAGAT]n=8	19	GRCh38.p12	6	42	19	23	19	19
									DYS458	chrY	7999839	7999902	[GAAA]16	16	GRCh38.p12	4	0	16	20	16	20
Simulated_data-3	100000	795887101	0	0	0	0	0	0	D12S391	chr12	12297020	12297095	[AGAT]11 [AGAC]7 AGAT	19	GRCh38.p12	4	0	15	19	15	19
									D18S51	chr18	63281667	63281738	[AGAA]18	18	GRCh38.p12	4	0	14	18	14	18
									D22S1045	chr22	37140287	37140337	[ATT]14 ACT [ATT]2	17	GRCh38.p12	3	0	13	17	13	17
									DYS635	chrY	12258860	12258951	[TAGA]9 [TACA]2 [TAGA]2 [TACA]2 [TAGA]2 [TACA]2 [TAGA]4	23	GRCh38.p12	4	0	19	23	19	23
									DYS437	chrY	12346267	12346326	[TCTA]9 [TCTG]2 [TCTA]4	15	GRCh38.p12	4	0	11	15	15	15
									DYS438	chrY	12825889	12825948	[TTTTC]12	12	GRCh38.p12	5	0	8	12	8	12
									DYS390	chrY	15163067	15163162	[TAGA]4 CAGA [TAGA]11 [CAGA]8	24	GRCh38.p12	4	0	20	24	20	24
									DYS392	chrY	20471987	20472025	[ATA]13	13	GRCh38.p12	3	0	9	13	9	13
									DYS448	chrY	22218923	22219078	[AGAGAT]n=11 [atagag]2 [agatag]3 [atag]2 agaa [AGAGAT]n=8	19	GRCh38.p12	6	42	15	19	15	19
									DYS458	chrY	7999839	7999902	[GAAA]16	16	GRCh38.p12	4	0	12	16	12	16
Simulated_data-3	100000	798764501	30026177	16875927	19834024	0.0375908	0.0211275	0.0248309	D12S391	chr12	12297020	12297095	[AGAT]11 [AGAC]7 AGAT	19	GRCh38.p12	4	0	15	19	15	19
									D18S51	chr18	63281667	63281738	[AGAA]18	18	GRCh38.p12	4	0	14	18	14	18
									D22S1045	chr22	37140287	37140337	[ATT]14 ACT [ATT]2	17	GRCh38.p12	3	0	13	17	13	17
									DYS635	chrY	12258860	12258951	[TAGA]9 [TACA]2 [TAGA]2 [TACA]2 [TAGA]2 [TACA]2 [TAGA]4	23	GRCh38.p12	4	0	19	23	19	23
									DYS437	chrY	12346267	12346326	[TCTA]9 [TCTG]2 [TCTA]4	15	GRCh38.p12	4	0	11	15	15	15
									DYS438	chrY	12825889	12825948	[TTTTC]12	12	GRCh38.p12	5	0	8	12	8	12
									DYS390	chrY	15163067	15163162	[TAGA]4 CAGA [TAGA]11 [CAGA]8	24	GRCh38.p12	4	0	20	24	20	24
									DYS392	chrY	20471987	20472025	[ATA]13	13	GRCh38.p12	3	0	9	13	9	13
									DYS448	chrY	22218923	22219078	[AGAGAT]n=11 [atagag]2 [agatag]3 [atag]2 agaa [AGAGAT]n=8	19	GRCh38.p12	6	42	15	19	15	19
									DYS458	chrY	7999839	7999902	[GAAA]16	16	GRCh38.p12	4	0	12	16	12	16
Simulated_data-3	100000	801916018	28522329	16034680	18845538	0.0355677	0.0199955	0.0235006	D12S391	chr12	12297020	12297095	[AGAT]11 [AGAC]7 AGAT	19	GRCh38.p12	4	0	15	19	15	19
									D18S51	chr18	63281667	63281738	[AGAA]18	18	GRCh38.p12	4	0	14	18	14	18
									D22S1045	chr22	37140287	37140337	[ATT]14 ACT [ATT]2	17	GRCh38.p12	3	0	13	17	13	17
									DYS635	chrY	12258860	12258951	[TAGA]9 [TACA]2 [TAGA]2 [TACA]2 [TAGA]2 [TACA]2 [TAGA]4	23	GRCh38.p12	4	0	19	23	19	23
									DYS437	chrY	12346267	12346326	[TCTA]9 [TCTG]2 [TCTA]4	15	GRCh38.p12	4	0	11	15	15	15
									DYS438	chrY	12825889	12825948	[TTTTC]12	12	GRCh38.p12	5	0	8	12	8	12
									DYS390	chrY	15163067	15163162	[TAGA]4 CAGA [TAGA]11 [CAGA]8	24	GRCh38.p12	4	0	20	24	20	24
									DYS392	chrY	20471987	20472025	[ATA]13	13	GRCh38.p12	3	0	9	13	9	13
									DYS448	chrY	22218923	22219078	[AGAGAT]n=11 [atagag]2 [agatag]3 [atag]2 agaa [AGAGAT]n=8	19	GRCh38.p12	6	42	15	19	15	19
									DYS458	chrY	7999839	7999902	[GAAA]16	16	GRCh38.p12	4	0	12	16	12	16
Simulated_data-3	100000	800454515	26902608	15124874	17765425	0.0336092	0.0188954	0.0221942	D12S391	chr12	12297020	12297095	[AGAT]11 [AGAC]7 AGAT	19	GRCh38.p12	4	0	15	19	15	19
									D18S51	chr18	63281667	63281738	[AGAA]18	18	GRCh38.p12	4	0	14	18	14	18
									D22S1045	chr22	37140287	37140337	[ATT]14 ACT [ATT]2	17	GRCh38.p12	3	0	13	17	13	17
									DYS635	chrY	12258860	12258951	[TAGA]9 [TACA]2 [TAGA]2 [TACA]2 [TAGA]2 [TACA]2 [TAGA]4	23	GRCh38.p12	4	0	19	23	19	23
									DYS437	chrY	12346267	12346326	[TCTA]9 [TCTG]2 [TCTA]4	15	GRCh38.p12	4	0	11	15	15	15
									DYS438	chrY	12825889	12825948	[TTTTC]12	12	GRCh38.p12	5	0	8	12	8	12
									DYS390	chrY	15163067	15163162	[TAGA]4 CAGA [TAGA]11 [CAGA]8	24	GRCh38.p12	4	0	20	24	20	24
									DYS392	chrY	20471987	20472025	[ATA]13	13	GRCh38.p12	3	0	9	13	9	13
									DYS448	chrY	22218923	22219078	[AGAGAT]n=11 [atagag]2 [agatag]3 [atag]2 agaa [AGAGAT]n=8	19	GRCh38.p12	6	42	15	19	15	19
									DYS458	chrY	7999839	7999902	[GAAA]16	16	GRCh38.p12	4	0	12	16	12	16
Simulated_data-3	100000	801202244	25390182	14271547	16758424	0.0316901	0.0178127	0.0209166	D12S391	chr12	12297020	12297095	[AGAT]11 [AGAC]7 AGAT	19	GRCh38.p12	4	0	15	19	15	19
									D18S51	chr18	63281667	63281738	[AGAA]18	18	GRCh38.p12	4	0	14	18	14	18
									D22S1045	chr22	37140287	37140337	[ATT]14 ACT [ATT]2	17	GRCh38.p12	3	0	13	17	13	17
									DYS635	chrY	12258860	12258951	[TAGA]9 [TACA]2 [TAGA]2 [TACA]2 [TAGA]2 [TACA]2 [TAGA]4	23	GRCh38.p12	4	0	19	23	19	23
									DYS437	chrY	12346267	12346326	[TCTA]9 [TCTG]2 [TCTA]4	15	GRCh38.p12	4	0	11	15	15	15
									DYS438	chrY	12825889	12825948	[TTTTC]12	12	GRCh38.p12	5	0	8	12	8	12
									DYS390	chrY	15163067	15163162	[TAGA]4 CAGA [TAGA]11 [CAGA]8	24	GRCh38.p12	4	0	20	24	20	24
									DYS392	chrY	20471987	20472025	[ATA]13	13	GRCh38.p12	3	0	9	13	9	13
									DYS448	chrY	22218923	22219078	[AGAGAT]n=11 [atagag]2 [agatag]3 [atag]2 agaa [AGAGAT]n=8	19	GRCh38.p12	6	42	15	19	15	19
									DYS458	chrY	7999839	7999902	[GAAA]16	16	GRCh38.p12	4	0	12	16	12	16
Simulated_data-3	100000	800582843	23768304	13364672	15701200	0.0296888	0.0166937	0.0196122	D12S391	chr12	12297020	12297095	[AGAT]11 [AGAC]7 AGAT	19	GRCh38.p12	4	0	15	19	15	19
									D18S51	chr18	63281667	63281738	[AGAA]18	18	GRCh38.p12	4	0	14	18	14	18
									D22S1045	chr22	37140287	37140337	[ATT]14 ACT [ATT]2	17	GRCh38.p12	3	0	13	17	13	17
									DYS635	chrY	12258860	12258951	[TAGA]9 [TACA]2 [TAGA]2 [TACA]2 [TAGA]2 [TACA]2 [TAGA]4	23	GRCh38.p12	4	0	19	23	19	23
									DYS437	chrY	12346267	12346326	[TCTA]9 [TCTG]2 [TCTA]4	15	GRCh38.p12	4	0	11	15	15	15
									DYS438	chrY	12825889	12825948	[TTTTC]12	12	GRCh38.p12	5	0	8	12	8	12
									DYS390	chrY	15163067	15163162	[TAGA]4 CAGA [TAGA]11 [CAGA]8	24	GRCh38.p12	4	0	20	24	20	24
									DYS392	chrY	20471987	20472025	[ATA]13	13	GRCh38.p12	3	0	9	13	9	13
									DYS448	chrY	22218923	22219078	[AGAGAT]n=11 [atagag]2 [agatag]3 [atag]2 agaa [AGAGAT]n=8	19	GRCh38.p12	6	42	15	19	15	19
									DYS458	chrY	7999839	7999902	[GAAA]16	16	GRCh38.p12	4	0	12	16	12	16
Simulated_data-3	100000	799875524	22196788	12475309	14659798	0.0277503	0.0155966	0.0183276	D12S391	chr12	12297020	12297095	[AGAT]11 [AGAC]7 AGAT	19	GRCh38.p12	4	0	15	19	15	19
									D18S51	chr18	63281667	63281738	[AGAA]18	18	GRCh38.p12	4	0	14	18	14	18
									D22S1045	chr22	37140287	37140337	[ATT]14 ACT [ATT]2	17	GRCh38.p12	3	0	13	17	13	17
									DYS635	chrY	12258860	12258951	[TAGA]9 [TACA]2 [TAGA]2 [TACA]2 [TAGA]2 [TACA]2 [TAGA]4	23	GRCh38.p12	4	0	19	23	19	23
									DYS437	chrY	12346267	12346326	[TCTA]9 [TCTG]2 [TCTA]4	15	GRCh38.p12	4	0	11	15	15	15
									DYS438	chrY	12825889	12825948	[TTTTC]12	12	GRCh38.p12	5	0	8	12	8	12
									DYS390	chrY	15163067	15163162	[TAGA]4 CAGA [TAGA]11 [CAGA]8	24	GRCh38.p12	4	0	20	24	20	24
									DYS392	chrY	20471987	20472025	[ATA]13	13	GRCh38.p12	3	0	9	13	9	13
									DYS448	chrY	22218923	22219078	[AGAGAT]n=11 [atagag]2 [agatag]3 [atag]2 agaa [AGAGAT]n=8	19	GRCh38.p12	6	42	15	19	15	19
									DYS458	chrY	7999839	7999902	[GAAA]16	16	GRCh38.p12	4	0	12	16	12	16
Simulated_data-3	100000	799690907	20581680	11568098	13595833	0.025737	0.0144657	0.0170014	D12S391	chr12	12297020	12297095	[AGAT]11 [AGAC]7 AGAT	19	GRCh38.p12	4	0	15	19	15	19
									D18S51	chr18	63281667	63281738	[AGAA]18	18	GRCh38.p12	4	0	14	18	14	18
									D22S1045	chr22	37140287	37140337	[ATT]14 ACT [ATT]2	17	GRCh38.p12	3	0	13	17	13	17
									DYS635	chrY	12258860	12258951	[TAGA]9 [TACA]2 [TAGA]2 [TACA]2 [TAGA]2 [TACA]2 [TAGA]4	23	GRCh38.p12	4	0	19	23	19	23
									DYS437	chrY	12346267	12346326	[TCTA]9 [TCTG]2 [TCTA]4	15	GRCh38.p12	4	0	11	15	11	15
									DYS438	chrY	12825889	12825948	[TTTTC]12	12	GRCh38.p12	5	0	8	12	8	12
									DYS390	chrY	15163067	15163162	[TAGA]4 CAGA [TAGA]11 [CAGA]8	24	GRCh38.p12	4	0	20	24	20	24
									DYS392	chrY	20471987	20472025	[ATA]13	13	GRCh38.p12	3	0	9	13	9	13
									DYS448	chrY	22218923	22219078	[AGAGAT]n=11 [atagag]2 [agatag]3 [atag]2 agaa [AGAGAT]n=8	19	GRCh38.p12	6	42	15	19	15	19
									DYS458	chrY	7999839	7999902	[GAAA]16	16	GRCh38.p12	4	0	12	16	12	16
Simulated_data-3	100000	798456346	18970965	10664341	12525446	0.0237596	0.0133562	0.0156871	D12S391	chr12	12297020	12297095	[AGAT]11 [AGAC]7 AGAT	19	GRCh38.p12	4	0	15	19	15	19
									D18S51	chr18	63281667	63281738	[AGAA]18	18	GRCh38.p12	4	0	14	18	14	18
									D22S1045	chr22	37140287	37140337	[ATT]14 ACT [ATT]2	17	GRCh38.p12	3	0	13	17	13	17
									DYS635	chrY	12258860	12258951	[TAGA]9 [TACA]2 [TAGA]2 [TACA]2 [TAGA]2 [TACA]2 [TAGA]4	23	GRCh38.p12	4	0	19	23	19	23
									DYS437	chrY	12346267	12346326	[TCTA]9 [TCTG]2 [TCTA]4	15	GRCh38.p12	4	0	11	15	11	15
									DYS438	chrY	12825889	12825948	[TTTTC]12	12	GRCh38.p12	5	0	8	12	8	12
									DYS390	chrY	15163067	15163162	[TAGA]4 CAGA [TAGA]11 [CAGA]8	24	GRCh38.p12	4	0	20	24	20	24
									DYS392	chrY	20471987	20472025	[ATA]13	13	GRCh38.p12	3	0	9	13	9	13
									DYS448	chrY	22218923	22219078	[AGAGAT]n=11 [atagag]2 [agatag]3 [atag]2 agaa [AGAGAT]n=8	19	GRCh38.p12	6	42	15	19	15	19
									DYS458	chrY	7999839	7999902	[GAAA]16	16	GRCh38.p12	4	0	12	16	12	16
Simulated_data-3	100000	799467970	17424654	9796290	11512224	0.0217953	0.0122535	0.0143999	D12S391	chr12	12297020	12297095	[AGAT]11 [AGAC]7 AGAT	19	GRCh38.p12	4	0	15	19	15	19
									D18S51	chr18	63281667	63281738	[AGAA]18	18	GRCh38.p12	4	0	14	18	14	18
									D22S1045	chr22	37140287	37140337	[ATT]14 ACT [ATT]2	17	GRCh38.p12	3	0	13	17	13	17
									DYS635	chrY	12258860	12258951	[TAGA]9 [TACA]2 [TAGA]2 [TACA]2 [TAGA]2 [TACA]2 [TAGA]4	23	GRCh38.p12	4	0	19	23	19	23
									DYS437	chrY	12346267	12346326	[TCTA]9 [TCTG]2 [TCTA]4	15	GRCh38.p12	4	0	11	15	11	15
									DYS438	chrY	12825889	12825948	[TTTTC]12	12	GRCh38.p12	5	0	8	12	8	12
									DYS390	chrY	15163067	15163162	[TAGA]4 CAGA [TAGA]11 [CAGA]8	24	GRCh38.p12	4	0	20	24	20	24
									DYS392	chrY	20471987	20472025	[ATA]13	13	GRCh38.p12	3	0	9	13	9	13
									DYS448	chrY	22218923	22219078	[AGAGAT]n=11 [atagag]2 [agatag]3 [atag]2 agaa [AGAGAT]n=8	19	GRCh38.p12	6	42	15	19	15	19
									DYS458	chrY	7999839	7999902	[GAAA]16	16	GRCh38.p12	4	0	12	16	12	16
Simulated_data-3	100000	798625746	15846935	8899864	10459256	0.0198428	0.011144	0.0130966	D12S391	chr12	12297020	12297095	[AGAT]11 [AGAC]7 AGAT	19	GRCh38.p12	4	0	15	19	15	19
									D18S51	chr18	63281667	63281738	[AGAA]18	18	GRCh38.p12	4	0	14	18	14	18
									D22S1045	chr22	37140287	37140337	[ATT]14 ACT [ATT]2	17	GRCh38.p12	3	0	13	17	13	17
									DYS635	chrY	12258860	12258951	[TAGA]9 [TACA]2 [TAGA]2 [TACA]2 [TAGA]2 [TACA]2 [TAGA]4	23	GRCh38.p12	4	0	19	23	19	23
									DYS437	chrY	12346267	12346326	[TCTA]9 [TCTG]2 [TCTA]4	15	GRCh38.p12	4	0	11	15	15	15
									DYS438	chrY	12825889	12825948	[TTTTC]12	12	GRCh38.p12	5	0	8	12	8	12
									DYS390	chrY	15163067	15163162	[TAGA]4 CAGA [TAGA]11 [CAGA]8	24	GRCh38.p12	4	0	20	24	20	24
									DYS392	chrY	20471987	20472025	[ATA]13	13	GRCh38.p12	3	0	9	13	9	13
									DYS448	chrY	22218923	22219078	[AGAGAT]n=11 [atagag]2 [agatag]3 [atag]2 agaa [AGAGAT]n=8	19	GRCh38.p12	6	42	15	19	15	19
									DYS458	chrY	7999839	7999902	[GAAA]16	16	GRCh38.p12	4	0	12	16	12	16
Simulated_data-3	100000	797747242	14240070	7999220	9400160	0.0178504	0.0100273	0.0117834	D12S391	chr12	12297020	12297095	[AGAT]11 [AGAC]7 AGAT	19	GRCh38.p12	4	0	15	19	15	19
									D18S51	chr18	63281667	63281738	[AGAA]18	18	GRCh38.p12	4	0	14	18	14	18
									D22S1045	chr22	37140287	37140337	[ATT]14 ACT [ATT]2	17	GRCh38.p12	3	0	13	17	13	17
									DYS635	chrY	12258860	12258951	[TAGA]9 [TACA]2 [TAGA]2 [TACA]2 [TAGA]2 [TACA]2 [TAGA]4	23	GRCh38.p12	4	0	19	23	19	23
									DYS437	chrY	12346267	12346326	[TCTA]9 [TCTG]2 [TCTA]4	15	GRCh38.p12	4	0	11	15	15	15
									DYS438	chrY	12825889	12825948	[TTTTC]12	12	GRCh38.p12	5	0	8	12	8	12
									DYS390	chrY	15163067	15163162	[TAGA]4 CAGA [TAGA]11 [CAGA]8	24	GRCh38.p12	4	0	20	24	20	24
									DYS392	chrY	20471987	20472025	[ATA]13	13	GRCh38.p12	3	0	9	13	9	13
									DYS448	chrY	22218923	22219078	[AGAGAT]n=11 [atagag]2 [agatag]3 [atag]2 agaa [AGAGAT]n=8	19	GRCh38.p12	6	42	15	19	15	19
									DYS458	chrY	7999839	7999902	[GAAA]16	16	GRCh38.p12	4	0	12	16	12	16
Simulated_data-3	100000	798377165	12697481	7138115	8382915	0.0159041	0.00894078	0.0104999	D12S391	chr12	12297020	12297095	[AGAT]11 [AGAC]7 AGAT	19	GRCh38.p12	4	0	15	19	15	19
									D18S51	chr18	63281667	63281738	[AGAA]18	18	GRCh38.p12	4	0	14	18	14	18
									D22S1045	chr22	37140287	37140337	[ATT]14 ACT [ATT]2	17	GRCh38.p12	3	0	13	17	13	17
									DYS635	chrY	12258860	12258951	[TAGA]9 [TACA]2 [TAGA]2 [TACA]2 [TAGA]2 [TACA]2 [TAGA]4	23	GRCh38.p12	4	0	19	23	19	23
									DYS437	chrY	12346267	12346326	[TCTA]9 [TCTG]2 [TCTA]4	15	GRCh38.p12	4	0	11	15	11	15
									DYS438	chrY	12825889	12825948	[TTTTC]12	12	GRCh38.p12	5	0	8	12	8	12
									DYS390	chrY	15163067	15163162	[TAGA]4 CAGA [TAGA]11 [CAGA]8	24	GRCh38.p12	4	0	20	24	20	24
									DYS392	chrY	20471987	20472025	[ATA]13	13	GRCh38.p12	3	0	9	13	9	13
									DYS448	chrY	22218923	22219078	[AGAGAT]n=11 [atagag]2 [agatag]3 [atag]2 agaa [AGAGAT]n=8	19	GRCh38.p12	6	42	15	19	15	19
									DYS458	chrY	7999839	7999902	[GAAA]16	16	GRCh38.p12	4	0	12	16	12	16
Simulated_data-3	100000	799185547	11142940	6264573	7358289	0.0139429	0.0078387	0.00920723	D12S391	chr12	12297020	12297095	[AGAT]11 [AGAC]7 AGAT	19	GRCh38.p12	4	0	15	19	15	19
									D18S51	chr18	63281667	63281738	[AGAA]18	18	GRCh38.p12	4	0	14	18	14	18
									D22S1045	chr22	37140287	37140337	[ATT]14 ACT [ATT]2	17	GRCh38.p12	3	0	13	17	13	17
									DYS635	chrY	12258860	12258951	[TAGA]9 [TACA]2 [TAGA]2 [TACA]2 [TAGA]2 [TACA]2 [TAGA]4	23	GRCh38.p12	4	0	19	23	19	23
									DYS437	chrY	12346267	12346326	[TCTA]9 [TCTG]2 [TCTA]4	15	GRCh38.p12	4	0	11	15	11	15
									DYS438	chrY	12825889	12825948	[TTTTC]12	12	GRCh38.p12	5	0	8	12	8	12
									DYS390	chrY	15163067	15163162	[TAGA]4 CAGA [TAGA]11 [CAGA]8	24	GRCh38.p12	4	0	20	24	20	24
									DYS392	chrY	20471987	20472025	[ATA]13	13	GRCh38.p12	3	0	9	13	9	13
									DYS448	chrY	22218923	22219078	[AGAGAT]n=11 [atagag]2 [agatag]3 [atag]2 agaa [AGAGAT]n=8	19	GRCh38.p12	6	42	15	19	15	19
									DYS458	chrY	7999839	7999902	[GAAA]16	16	GRCh38.p12	4	0	12	16	12	16
Simulated_data-3	100000	798260923	9515569	5351104	6281924	0.0119204	0.00670345	0.00786951	D12S391	chr12	12297020	12297095	[AGAT]11 [AGAC]7 AGAT	19	GRCh38.p12	4	0	15	19	15	19
									D18S51	chr18	63281667	63281738	[AGAA]18	18	GRCh38.p12	4	0	14	18	14	18
									D22S1045	chr22	37140287	37140337	[ATT]14 ACT [ATT]2	17	GRCh38.p12	3	0	13	17	13	17
									DYS635	chrY	12258860	12258951	[TAGA]9 [TACA]2 [TAGA]2 [TACA]2 [TAGA]2 [TACA]2 [TAGA]4	23	GRCh38.p12	4	0	19	23	19	23
									DYS437	chrY	12346267	12346326	[TCTA]9 [TCTG]2 [TCTA]4	15	GRCh38.p12	4	0	11	15	11	15
									DYS438	chrY	12825889	12825948	[TTTTC]12	12	GRCh38.p12	5	0	8	12	8	12
									DYS390	chrY	15163067	15163162	[TAGA]4 CAGA [TAGA]11 [CAGA]8	24	GRCh38.p12	4	0	20	24	20	24
									DYS392	chrY	20471987	20472025	[ATA]13	13	GRCh38.p12	3	0	9	13	9	13
									DYS448	chrY	22218923	22219078	[AGAGAT]n=11 [atagag]2 [agatag]3 [atag]2 agaa [AGAGAT]n=8	19	GRCh38.p12	6	42	15	19	15	19
									DYS458	chrY	7999839	7999902	[GAAA]16	16	GRCh38.p12	4	0	12	16	12	16
Simulated_data-3	100000	798024418	7984528	4485324	5271453	0.0100054	0.00562053	0.00660563	D12S391	chr12	12297020	12297095	[AGAT]11 [AGAC]7 AGAT	19	GRCh38.p12	4	0	15	19	15	19
									D18S51	chr18	63281667	63281738	[AGAA]18	18	GRCh38.p12	4	0	14	18	14	18
									D22S1045	chr22	37140287	37140337	[ATT]14 ACT [ATT]2	17	GRCh38.p12	3	0	13	17	13	17
									DYS635	chrY	12258860	12258951	[TAGA]9 [TACA]2 [TAGA]2 [TACA]2 [TAGA]2 [TACA]2 [TAGA]4	23	GRCh38.p12	4	0	19	23	19	23
									DYS437	chrY	12346267	12346326	[TCTA]9 [TCTG]2 [TCTA]4	15	GRCh38.p12	4	0	11	15	11	15
									DYS438	chrY	12825889	12825948	[TTTTC]12	12	GRCh38.p12	5	0	8	12	8	12
									DYS390	chrY	15163067	15163162	[TAGA]4 CAGA [TAGA]11 [CAGA]8	24	GRCh38.p12	4	0	20	24	20	24
									DYS392	chrY	20471987	20472025	[ATA]13	13	GRCh38.p12	3	0	9	13	9	13
									DYS448	chrY	22218923	22219078	[AGAGAT]n=11 [atagag]2 [agatag]3 [atag]2 agaa [AGAGAT]n=8	19	GRCh38.p12	6	42	15	19	15	19
									DYS458	chrY	7999839	7999902	[GAAA]16	16	GRCh38.p12	4	0	12	16	12	16
Simulated_data-3	100000	797493456	6378225	3581804	4208933	0.00799784	0.00449133	0.0052777	D12S391	chr12	12297020	12297095	[AGAT]11 [AGAC]7 AGAT	19	GRCh38.p12	4	0	15	19	15	19
									D18S51	chr18	63281667	63281738	[AGAA]18	18	GRCh38.p12	4	0	14	18	14	18
									D22S1045	chr22	37140287	37140337	[ATT]14 ACT [ATT]2	17	GRCh38.p12	3	0	13	17	13	17
									DYS635	chrY	12258860	12258951	[TAGA]9 [TACA]2 [TAGA]2 [TACA]2 [TAGA]2 [TACA]2 [TAGA]4	23	GRCh38.p12	4	0	19	23	19	23
									DYS437	chrY	12346267	12346326	[TCTA]9 [TCTG]2 [TCTA]4	15	GRCh38.p12	4	0	11	15	11	15
									DYS438	chrY	12825889	12825948	[TTTTC]12	12	GRCh38.p12	5	0	8	12	8	12
									DYS390	chrY	15163067	15163162	[TAGA]4 CAGA [TAGA]11 [CAGA]8	24	GRCh38.p12	4	0	20	24	20	24
									DYS392	chrY	20471987	20472025	[ATA]13	13	GRCh38.p12	3	0	9	13	9	13
									DYS448	chrY	22218923	22219078	[AGAGAT]n=11 [atagag]2 [agatag]3 [atag]2 agaa [AGAGAT]n=8	19	GRCh38.p12	6	42	15	19	15	19
									DYS458	chrY	7999839	7999902	[GAAA]16	16	GRCh38.p12	4	0	12	16	12	16
Simulated_data-3	100000	797719159	4779350	2686991	3159388	0.00599127	0.00336834	0.00396053	D12S391	chr12	12297020	12297095	[AGAT]11 [AGAC]7 AGAT	19	GRCh38.p12	4	0	15	19	15	19
									D18S51	chr18	63281667	63281738	[AGAA]18	18	GRCh38.p12	4	0	14	18	14	18
									D22S1045	chr22	37140287	37140337	[ATT]14 ACT [ATT]2	17	GRCh38.p12	3	0	13	17	13	17
									DYS635	chrY	12258860	12258951	[TAGA]9 [TACA]2 [TAGA]2 [TACA]2 [TAGA]2 [TACA]2 [TAGA]4	23	GRCh38.p12	4	0	19	23	19	23
									DYS437	chrY	12346267	12346326	[TCTA]9 [TCTG]2 [TCTA]4	15	GRCh38.p12	4	0	11	15	15	15
									DYS438	chrY	12825889	12825948	[TTTTC]12	12	GRCh38.p12	5	0	8	12	8	12
									DYS390	chrY	15163067	15163162	[TAGA]4 CAGA [TAGA]11 [CAGA]8	24	GRCh38.p12	4	0	20	24	20	24
									DYS392	chrY	20471987	20472025	[ATA]13	13	GRCh38.p12	3	0	9	13	9	13
									DYS448	chrY	22218923	22219078	[AGAGAT]n=11 [atagag]2 [agatag]3 [atag]2 agaa [AGAGAT]n=8	19	GRCh38.p12	6	42	15	19	15	19
									DYS458	chrY	7999839	7999902	[GAAA]16	16	GRCh38.p12	4	0	12	16	12	16
Simulated_data-3	100000	796094669	3156304	1773690	2084272	0.00396473	0.00222799	0.00261812	D12S391	chr12	12297020	12297095	[AGAT]11 [AGAC]7 AGAT	19	GRCh38.p12	4	0	15	19	15	19
									D18S51	chr18	63281667	63281738	[AGAA]18	18	GRCh38.p12	4	0	14	18	14	18
									D22S1045	chr22	37140287	37140337	[ATT]14 ACT [ATT]2	17	GRCh38.p12	3	0	13	17	13	17
									DYS635	chrY	12258860	12258951	[TAGA]9 [TACA]2 [TAGA]2 [TACA]2 [TAGA]2 [TACA]2 [TAGA]4	23	GRCh38.p12	4	0	19	23	19	23
									DYS437	chrY	12346267	12346326	[TCTA]9 [TCTG]2 [TCTA]4	15	GRCh38.p12	4	0	11	15	15	15
									DYS438	chrY	12825889	12825948	[TTTTC]12	12	GRCh38.p12	5	0	8	12	8	12
									DYS390	chrY	15163067	15163162	[TAGA]4 CAGA [TAGA]11 [CAGA]8	24	GRCh38.p12	4	0	20	24	20	24
									DYS392	chrY	20471987	20472025	[ATA]13	13	GRCh38.p12	3	0	9	13	9	13
									DYS448	chrY	22218923	22219078	[AGAGAT]n=11 [atagag]2 [agatag]3 [atag]2 agaa [AGAGAT]n=8	19	GRCh38.p12	6	42	15	19	15	19
									DYS458	chrY	7999839	7999902	[GAAA]16	16	GRCh38.p12	4	0	12	16	12	16
Simulated_data-3	100000	796574394	1588610	891574	1048207	0.0019943	0.00111926	0.00131589	D12S391	chr12	12297020	12297095	[AGAT]11 [AGAC]7 AGAT	19	GRCh38.p12	4	0	15	19	15	19
									D18S51	chr18	63281667	63281738	[AGAA]18	18	GRCh38.p12	4	0	14	18	14	18
									D22S1045	chr22	37140287	37140337	[ATT]14 ACT [ATT]2	17	GRCh38.p12	3	0	13	17	13	17
									DYS635	chrY	12258860	12258951	[TAGA]9 [TACA]2 [TAGA]2 [TACA]2 [TAGA]2 [TACA]2 [TAGA]4	23	GRCh38.p12	4	0	19	23	19	23
									DYS437	chrY	12346267	12346326	[TCTA]9 [TCTG]2 [TCTA]4	15	GRCh38.p12	4	0	11	15	15	15
									DYS438	chrY	12825889	12825948	[TTTTC]12	12	GRCh38.p12	5	0	8	12	8	12
									DYS390	chrY	15163067	15163162	[TAGA]4 CAGA [TAGA]11 [CAGA]8	24	GRCh38.p12	4	0	20	24	20	24
									DYS392	chrY	20471987	20472025	[ATA]13	13	GRCh38.p12	3	0	9	13	9	13
									DYS448	chrY	22218923	22219078	[AGAGAT]n=11 [atagag]2 [agatag]3 [atag]2 agaa [AGAGAT]n=8	19	GRCh38.p12	6	42	15	19	15	19
									DYS458	chrY	7999839	7999902	[GAAA]16	16	GRCh38.p12	4	0	12	16	12	16
Simulated_data-3	100000	773675951	29830991	16763789	19699472	0.0385575	0.0216677	0.0254622	D12S391	chr12	12297020	12297095	[AGAT]11 [AGAC]7 AGAT	19	GRCh38.p12	4	0	15	19	15	19
									D18S51	chr18	63281667	63281738	[AGAA]18	18	GRCh38.p12	4	0	14	18	14	14
									D22S1045	chr22	37140287	37140337	[ATT]14 ACT [ATT]2	17	GRCh38.p12	3	0	13	17	13	17
									DYS635	chrY	12258860	12258951	[TAGA]9 [TACA]2 [TAGA]2 [TACA]2 [TAGA]2 [TACA]2 [TAGA]4	23	GRCh38.p12	4	0	19	23	22	23
									DYS437	chrY	12346267	12346326	[TCTA]9 [TCTG]2 [TCTA]4	15	GRCh38.p12	4	0	11	15	15	15
									DYS438	chrY	12825889	12825948	[TTTTC]12	12	GRCh38.p12	5	0	8	12	11	12
									DYS390	chrY	15163067	15163162	[TAGA]4 CAGA [TAGA]11 [CAGA]8	24	GRCh38.p12	4	0	20	24	24	24
									DYS392	chrY	20471987	20472025	[ATA]13	13	GRCh38.p12	3	0	9	13	12	13
									DYS448	chrY	22218923	22219078	[AGAGAT]n=11 [atagag]2 [agatag]3 [atag]2 agaa [AGAGAT]n=8	19	GRCh38.p12	6	42	15	19	20	20
									DYS458	chrY	7999839	7999902	[GAAA]16	16	GRCh38.p12	4	0	12	16	16	16

## Sheet: Sheet3
Table S3. Statistics of sequencing data for 9948 and 2800M with different sequencing platform.
Sample	Raw_reads	Raw_bases	Clean_reads	Clean_bases	Reads_Ratio	Bases_Ratio	GC_content	Q7_Rate	Read_length_N50	Platform
YF0824-9948-ONT	2597272	1209765414	2473444	780085280	0.952324	0.644824	0.425931	0.932045	327	MinION
YF0825-9948-ONT	2403823	1123992103	2278528	719967780	0.947877	0.640545	0.425705	0.925805	328	MinION
YF0826-9948-ONT	2683645	1259546726	2534462	804331106	0.94441	0.638588	0.425295	0.917306	329	MinION
YF0828-2800M-ONT	1716687	799218350	1617715	507336963	0.942347	0.634791	0.444109	0.905465	314	MinION
YF0829-2800M-ONT	1516328	719400189	1421180	460266236	0.937251	0.639792	0.444323	0.837053	321	MinION
YF0830-2800M-ONT	1249016	585154113	1173920	367895139	0.939876	0.628715	0.444816	0.899232	314	MinION
YF0837-9948-QNOME	755354	338421655	744249	267113434	0.985298	0.789292	0.429605	0.782769	355	QNOME
YF0838-9948-QNOME	820120	369154206	805043	289688653	0.981616	0.784736	0.427921	0.781662	357	QNOME
YF0839-9948-QNOME	522886	232695448	516485	197212068	0.987758	0.847511	0.423801	0.73437	383	QNOME
YF0802-2800M-QNOME	1251418	541638307	1229006	410829565	0.982091	0.758494	0.442901	0.797453	333	QNOME
YF0840-2800M-QNOME	2218310	971056784	2178233	735208806	0.981934	0.757122	0.441395	0.789868	337	QNOME
YF0841-2800M-QNOME	2323178	1020719037	2277475	770179091	0.980327	0.754546	0.44266	0.795844	336	QNOME

## Sheet: Sheet4
Table S4. Statistics of the NanoSTR, TRiCoLOR and Tandem-Genotypes analysis results for the 9984 and 2800M with MinION sequencing platform.
Locus	Chromosome	Start	End	Bracket Sequence	CE	Assembly	Unit Bases	Extra Bases	9948_Expected		NanoSTR						TRiCoLOR						Tandem-Genotypes						2800M_Expected		NanoSTR						TRiCoLOR						Tandem-Genotypes
											YF0824-9948-ONT		YF0825-9948-ONT		YF0826-9948-ONT		YF0824-9948-ONT		YF0825-9948-ONT		YF0826-9948-ONT		YF0824-9948-ONT		YF0825-9948-ONT		YF0826-9948-ONT				YF0828-2800M-ONT		YF0829-2800M-ONT		YF0830-2800M-ONT		YF0828-2800M-ONT		YF0829-2800M-ONT		YF0830-2800M-ONT		YF0828-2800M-ONT		YF0829-2800M-ONT		YF0830-2800M-ONT
									Allele1	Allele2	Allele1	Allele2	Allele1	Allele2	Allele1	Allele2	Allele1	Allele2	Allele1	Allele2	Allele1	Allele2	Allele1	Allele2	Allele1	Allele2	Allele1	Allele2	Allele1	Allele2	Allele1	Allele2	Allele1	Allele2	Allele1	Allele2	Allele1	Allele2	Allele1	Allele2	Allele1	Allele2	Allele1	Allele2	Allele1	Allele2	Allele1	Allele2
D1S1656	chr1	230769616	230769683	CCTA [TCTA]16	17	GRCh38.p12	4	0	14	17	14	17	14	17	14	17	16	16	16	16	16	16	15.75	15.75	-	-	-	-	12	13	12	13	12	13	12	13	16	16	16	16	16	16	-	-	11.75	11.75	13.75	13.75
D2S1338	chr2	218014859	218014950	[GGAA]2 GGAC [GGAA]13 [GGCA]7	23	GRCh38.p12	4	0	23	23	23	23	23	23	23	23	13	13	13	13	13	13	-	-	-	-	-	-	22	25	22	25	22	22	22	25	13	13	13	13	13	13	-	-	-	-	-	-
D2S441	chr2	68011947	68011994	[TCTA]12	12	GRCh38.p12	4	0	11	12	11	12	11	12	11	12	12	12	12	12	12	12	-	-	-	-	-	-	10	14	14	14	14	14	14	14	12	12	12	12	12	12	-	-	-	-	-	-
TPOX	chr2	1489653	1489684	[AATG]8	8	GRCh38.p12	4	0	8	9	8	9	8	9	8	9	8	8	8	8	8	8	8.5	9.5	8.5	9.5	8.5	9.5	11	11	11	11	11	11	11	11	8	8	8	8	8	8	11.5	11.5	11.5	11.5	11.5	11.5
D3S1358	chr3	45540739	45540802	TCTA TCTG [TCTA]14	16	GRCh38.p12	4	0	15	17	15	17	15	17	15	17	14	14	14	14	14	14	-	-	-	-	-	-	17	18	17	18	17	18	17	18	14	14	14	14	14	14	-	-	-	-	16.75	16.75
FGA	chr4	154587736	154587823	[GGAA]2 GGAG [AAAG]14 AGAA AAAA [GAAA]3	22	GRCh38.p12	4	0	24	26	24	24	24	24	24	24	14	14	14	14	14	14	3.125+15.75	3.125+15.75	3.125+16.75	3.125+16.75	3.125+16.75	3.125+16.75	20	23	20	20	20	20	20	20	14	14	14	14	14	14	3.125+12.75	3.125+12.75	3.125+12.75	3.125+14.75	3.125+12.75	3.125+12.75
CSF1PO	chr5	150076324	150076375	[ATCT]13	13	GRCh38.p12	4	0	10	11	10	11	10	11	10	11	13	13	13	13	13	13	-	-	-	-	-	-	12	12	12	12	12	12	12	12	13	13	13	13	13	13	-	-	-	-	-	-
D5S818	chr5	123775556	123775599	[ATCT]11	11	GRCh38.p12	4	0	11	13	11	13	11	13	11	13	11	11	11	11	11	11	-	-	-	-	-	-	12	12	12	12	12	12	12	12	11	11	11	11	11	11	-	-	-	-	-	-
D6S1043	chr6	91740225	91740272	[ATCT]12	12	GRCh38.p12	4	0	12	12	12	12	12	12	12	12	12	12	12	12	12	12	-	-	-	-	-	-	12	20	12	12	12	12	12	12	12	12	12	12	12	12	-	-	-	-	-	-
D7S820	chr7	84160226	84160277	[TATC]13	13	GRCh38.p12	4	0	11	11	11	11	11	11	11	11	13	13	13	13	13	13	11.5	11.5	11.5	11.5	11.5	11.5	8	11	8	11	8	11	8	11	13	13	13	13	13	13	8.5	8.5	9.5	9.5	8.5	8.5
D8S1179	chr8	124894865	124894916	TCTA TCTG [TCTA]11	13	GRCh38.p12	4	0	12	13	12	13	12	13	12	13	11	11	11	11	11	11	-	-	-	-	-	-	14	15	14	15	14	15	14	15	11	11	11	11	11	11	-	-	-	-	-	-
D10S1248	chr10	129294244	129294295	[GGAA]13	13	GRCh38.p12	4	0	12	15	12	15	12	15	12	15	13	13	13	13	13	13	-	-	-	-	-	-	13	15	13	15	13	15	13	15	13	13	13	13	13	13	-	-	-	-	-	-
TH01	chr11	2171088	2171115	[AATG]7	7	GRCh38.p12	4	0	6	9.3	6	10	6	10	6	10	-	-	-	-	-	-	-	-	-	-	-	-	6	9.3	6	10	6	6	6	6	-	-	-	-	-	-	-	-	-	-	-	-
D12S391	chr12	12297020	12297095	[AGAT]11 [AGAC]7 AGAT	19	GRCh38.p12	4	0	18	24	18	18	18	18	18	18	11	11	11	11	11	11	-	-	-	-	-	-	18	23	18	18	18	18	18	18	11	11	11	11	11	11	-	-	-	-	-	-
VWA	chr12	5983977	5984044	[TAGA]11 [CAGA]5 TAGA	17	GRCh38.p12	4	0	17	17	17	17	17	17	17	17	11	11	11	11	11	11	-	-	-	-	21	21	16	19	16	16	16	16	16	16	11	11	11	11	11	11	20+21+22	20+21+22	22	22	-	-
D13S317	chr13	82148025	82148068	[TATC]11	11	GRCh38.p12	4	0	11	11	11	11	11	11	11	11	11	11	11	11	11	11	-	-	-	-	-	-	9	11	9	11	9	11	9	11	11	11	11	11	11	11	-	-	-	-	-	-
PENTAE	chr15	96831015	96831039	[TCTTT]5	5	GRCh38.p12	5	0	11	11	11	11	11	11	11	11	-	-	-	-	-	-	11.6	12.6	9.6	11.6	11.6	11.6	7	14	7	7	7	7	7	7	-	-	-	-	-	-	7.6	7.6	-	-	-	-
D16S539	chr16	86352702	86352745	[GATA]11	11	GRCh38.p12	4	0	11	11	11	11	11	11	11	11	11	11	11	11	11	11	11	11	11	11	11	11	9	13	9	13	9	13	9	13	11	11	11	11	11	11	-	-	-	-	-	-
D18S51	chr18	63281667	63281738	[AGAA]18	18	GRCh38.p12	4	0	15	18	15	18	15	18	15	18	18	18	18	18	18	18	-	-	-	-	-	-	16	18	16	18	16	18	16	18	18	18	18	18	18	18	-	-	-	-	-	-
D19S433	chr19	29926235	29926298	[CCTT]12 ccta CCTT cttt CCTT	14	GRCh38.p12	4	8	13	14	13	14	13	14	13	14	12	12	12	12	12	12	-	-	-	-	-	-	13	14	13	14	13	14	13	14	12	12	12	12	12	12	-	-	-	-	-	-
D21S11	chr21	19181973	19182099	[TCTA]4 [TCTG]6 [TCTA]3 ta [TCTA]3 tca [TCTA]2 tccata [TCTA]11	29	GRCh38.p12	4	11	29	30	29	30	29	30	29	30	11	11	11	11	11	11	13.25+14.25	13.25+14.25	12.25	12.25	14.25	14.25	29	31.2	29	32	29	32	29	32	11	11	11	11	11	11	-	-	14.25	14.25	14.25	14.25
PENTAD	chr21	43636205	43636269	[AAAGA]13	13	GRCh38.p12	5	0	8	12	8	8	8	8	8	8	13	13	13	13	13	13	-	-	-	-	-	-	12	13	12	12	11	12	11	12	13	13	13	13	13	13	-	-	-	-	-	-
D22S1045	chr22	37140287	37140337	[ATT]14 ACT [ATT]2	17	GRCh38.p12	3	0	16	18	16	18	16	18	16	18	14	14	14	14	14	14	13.3333	15.3333	13.3333	15.3333	13.3333	15.3333	16	16	16	16	15	16	16	16	14	14	14	14	14	14	13.3333	13.3333	13.3333	13.3333	13.3333	13.3333
DYS19	chrY	9684380	9684443	[TCTA]12 ccta [TCTA]3	15	GRCh38.p12	4	4	14	14	14	14	14	14	14	14	12	12	12	12	12	12	-	-	13.5	15.5	-	-	14	14	14	14	14	14	14	14	12	12	12	12	12	12	-	-	-	-	-	-
DYS385AB-b	chrY	18639713	18639756	[TTTC]11	11	GRCh38.p12	4	0	11	14	11	11	11	11	11	11	11	11	11	11	11	11	11.5	11.5	11.5	11.5	11.5	11.5	13	16	13	13	12	12	11	13	11	11	11	11	11	11	-	-	-	-	-	-
DYS385AB-a	chrY	18680632	18680687	[TTTC]14	14	GRCh38.p12	4	0	11	14	11	14	11	14	11	14	14	14	14	14	14	14	14.5	14.5	14.5	14.5	14.5	14.5	13	16	13	13	12	12	12	13	14	14	14	14	14	14	13.5	16.5	14.5	15.5	13.5	16.5+17.5
DYS389I/II	chrY	12500448	12500611	[TAGA]n=9 [CAGA]n=3 N48 [TAGA]n=12 [CAGA]n=5	29	GRCh38.p12	4	48	13	31	31	31	30	32	30	31	9	12	9	12	9	12	-	-	20	20	-	-	14	31	-	-	-	-	-	-	9	12	9	12	9	12	-	-	-	-	-	-
DYS390	chrY	15163067	15163162	[TAGA]4 CAGA [TAGA]11 [CAGA]8	24	GRCh38.p12	4	0	24	24	24	24	24	24	24	24	19	19	19	19	19	19	-	-	-	-	-	-	24	24	24	24	24	24	24	24	19	19	19	19	19	19	-	-	-	-	-	-
DYS391	chrY	11982089	11982132	[TCTA]11	11	GRCh38.p12	4	0	10	10	10	10	10	10	10	10	11	11	11	11	11	11	-	-	14.75	14.75	-	-	10	10	10	10	10	11	10	10	11	11	11	11	11	11	-	-	-	-	13.75	13.75
DYS392	chrY	20471987	20472025	[ATA]13	13	GRCh38.p12	3	0	13	13	13	13	13	13	13	13	13	13	13	13	13	13	-	-	-	-	-	-	13	13	13	13	13	13	13	13	13	13	13	13	13	13	-	-	-	-	-	-
DYS393	chrY	3263111	3263158	[AGAT]12	12	GRCh38.p12	4	0	13	13	13	13	13	13	13	13	12	12	12	12	12	12	13.25	13.25	13.25	13.25	13.25	13.25	13	13	13	13	13	13	13	13	12	12	12	12	12	12	13.25	13.25	13.25	13.25	13.25	13.25
DYS437	chrY	12346267	12346326	[TCTA]9 [TCTG]2 [TCTA]4	15	GRCh38.p12	4	0	15	15	15	15	15	15	15	15	9	9	9	9	9	9	-	-	-	-	-	-	14	14	14	14	14	14	14	14	9	9	9	9	9	9	-	-	-	-	-	-
DYS438	chrY	12825889	12825948	[TTTTC]12	12	GRCh38.p12	5	0	11	11	11	11	11	11	11	11	12	12	12	12	12	12	-	-	-	-	11.2	11.2	9	9	9	9	9	9	9	9	12	12	12	12	12	12	9.2	9.2	-	-	-	-
DYS439	chrY	12403517	12403564	[GATA]12	12	GRCh38.p12	4	0	12	12	12	12	12	12	12	12	12	12	12	12	12	12	12.75	12.75	-	-	-	-	12	12	12	12	12	12	12	12	12	12	12	12	12	12	-	-	-	-	12.75	12.75
DYS448	chrY	22218923	22219078	[AGAGAT]n=11 [atagag]2 [agatag]3 [atag]2 agaa [AGAGAT]n=8	19	GRCh38.p12	6	42	19	19	19	19	19	19	19	19	19	19	19	19	19	19	2.92857	2.92857	-	-	-	-	19	19	19	19	19	19	19	19	19	19	19	19	19	19	1.92857	2.92857	-	-	2.92857	2.92857
DYS456	chrY	4402919	4402978	[AGAT]15	15	GRCh38.p12	4	0	17	17	17	17	17	17	17	17	15	15	15	15	15	15	-	-	-	-	-	-	17	17	17	17	17	17	17	17	15	15	15	15	15	15	-	-	-	-	-	-
DYS458	chrY	7999839	7999902	[GAAA]16	16	GRCh38.p12	4	0	18	18	17	18	17	18	17	18	16	16	16	16	16	16	-	-	-	-	-	-	17	17	16	17	17	17	17	17	16	16	16	16	16	16	-	-	-	-	-	-
DYS481	chrY	8558337	8558402	[CTT]22	22	GRCh38.p12	3	0	24	24	24	24	24	24	24	24	22	22	22	22	22	22	-	-	-	-	-	-	22	22	22	22	22	22	22	22	22	22	22	22	22	22	-	-	-	-	-	-
DYS533	chrY	16281349	16281396	[TATC]12	12	GRCh38.p12	4	0	12	12	12	12	12	12	12	12	12	12	12	12	12	12	-	-	-	-	-	-	12	12	12	12	-	-	12	12	12	12	12	12	12	12	-	-	-	-	-	-
DYS549	chrY	19358338	19358389	[GATA]13	13	GRCh38.p12	4	0	13	13	13	13	13	13	13	13	13	13	13	13	13	13	13.5	13.5	13.5	13.5	13.5	13.5	13	13	13	13	13	13	13	13	13	13	13	13	13	13	13.5	13.5	13.5	13.5	13.5	13.5
DYS570	chrY	6993190	6993257	[TTTC]17	17	GRCh38.p12	4	0	18	18	17	18	17	18	17	18	17	17	17	17	17	17	-	-	-	-	-	-	17	17	17	17	17	17	17	17	17	17	17	17	17	17	-	-	-	-	-	-
DYS576	chrY	7185318	7185385	[AAAG]19	17	GRCh38.p12	4	0	16	16	16	16	16	16	16	16	17	17	17	17	17	17	-	-	-	-	-	-	18	18	18	18	18	18	18	18	17	17	17	17	17	17	-	-	-	-	-	-
DYS635	chrY	12258860	12258951	[TAGA]9 [TACA]2 [TAGA]2 [TACA]2 [TAGA]2 [TACA]2 [TAGA]4	23	GRCh38.p12	4	0	23	23	23	23	23	23	23	23	9	9	9	9	9	9	-	-	-	-	-	-	21	21	21	21	21	21	21	21	9	9	9	9	9	9	-	-	-	-	-	-
DYS643	chrY	15314132	15314186	[CTTTT]11	11	GRCh38.p12	5	0	11	11	11	11	11	11	11	11	11	11	11	11	11	11	13	13	13	13	13	13	10	10	10	10	9	10	10	11	11	11	11	11	11	11	12	12	12	12	12	12
YGATAH4	chrY	16631673	16631720	[TCTA]12	12	GRCh38.p12	4	0	12	12	12	12	12	12	12	12	12	12	12	12	12	12	17.25	17.25	17.25	17.25	17.25	17.25	11	11	11	11	11	11	11	11	12	12	12	12	12	12	16.25	17.25	16.25	17.25	15.25	15.25

## Sheet: Sheet5
Table S5. Statistics of the NanoSTR, TRiCoLOR and Tandem-Genotypes analysis results for the 9984 and 2800M with QNOME-3841 sequencing platform.
Locus	Chromosome	Start	End	Bracket Sequence	CE	Assembly	Unit Bases	Extra Bases	9948_Expected		NanoSTR						TRiCoLOR						Tandem-Genotypes						2800M_Expected		NanoSTR						TRiCoLOR						Tandem-Genotypes
											YF0837-9948-QNOME		YF0838-9948-QNOME		YF0839-9948-QNOME		YF0837-9948-QNOME		YF0838-9948-QNOME		YF0839-9948-QNOME		YF0837-9948-QNOME		YF0838-9948-QNOME		YF0839-9948-QNOME				YF0802-2800M-QNOME		YF0840-2800M-QNOME		YF0841-2800M-QNOME		YF0802-2800M-QNOME		YF0840-2800M-QNOME		YF0841-2800M-QNOME		YF0802-2800M-QNOME		YF0840-2800M-QNOME		YF0841-2800M-QNOME
									Allele1	Allele2	Allele1	Allele2	Allele1	Allele2	Allele1	Allele2	Allele1	Allele2	Allele1	Allele2	Allele1	Allele2	Allele1	Allele2	Allele1	Allele2	Allele1	Allele2	Allele1	Allele2	Allele1	Allele2	Allele1	Allele2	Allele1	Allele2	Allele1	Allele2	Allele1	Allele2	Allele1	Allele2	Allele1	Allele2	Allele1	Allele2	Allele1	Allele2
D1S1656	chr1	230769616	230769683	CCTA [TCTA]16	17	GRCh38.p12	4	0	14	17	15	17	14	17	14	17	16	16	16	16	16	16	13.75/14.75	18.75	12.75	13.75	12.75	15.75	12	13	12	13	12	13	12	13	16	16	16	16	16	16	11.75	11.75	11.75	11.75	11.75	11.75
D2S1338	chr2	218014859	218014950	[GGAA]2 GGAC [GGAA]13 [GGCA]7	23	GRCh38.p12	4	0	23	23	23	24	23	23	23	23	13	13	13	13	13	13	-	-	23	23	-	-	22	25	22	25	22	25	22	25	13	13	13	13	13	13	-	-	-	-	-	-
D2S441	chr2	68011947	68011994	[TCTA]12	12	GRCh38.p12	4	0	11	12	11	12	11	12	12	12	12	12	12	12	12	12	-	-	-	-	-	-	10	14	14	14	14	14	14	14	12	12	12	12	12	12	-	-	-	-	-	-
TPOX	chr2	1489653	1489684	[AATG]8	8	GRCh38.p12	4	0	8	9	8	9	8	9	8	8	8	8	8	8	8	8	8.5	9.5	8.5	9.5	8.5	9.5	11	11	11	11	11	11	11	11	8	8	8	8	8	8	11.5	11.5	11.5	11.5	11.5	11.5
D3S1358	chr3	45540739	45540802	TCTA TCTG [TCTA]14	16	GRCh38.p12	4	0	15	17	15	17	15	17	15	17	14	14	14	14	14	14	14.75	16.75	15.75	16.75	14.75/15.75	16.75/17.75	17	18	17	18	17	18	17	18	14	14	14	14	14	14	17.75	18.75	16.75	17.75	18.75	18.75
FGA	chr4	154587736	154587823	[GGAA]2 GGAG [AAAG]14 AGAA AAAA [GAAA]3	22	GRCh38.p12	4	0	24	26	24	25	24	25	25	25	14	14	14	14	14	14	3.125+16.75	3.125+16.75	3.125+16.75	3.125+16.75	3.125+16.75	3.125+16.75	20	23	20	20	20	20	20	20	14	14	14	14	14	14	3.125+12.75/14/75	3.125+12.75/14/75	3.125+12.75/14/75	3.125+12.75/14/75	3.125+12.75/14/75	3.125+12.75/14/75
CSF1PO	chr5	150076324	150076375	[ATCT]13	13	GRCh38.p12	4	0	10	11	11	11	10	11	10	11	13	13	13	13	13	13	-	-	-	-	-	-	12	12	12	13	12	12	12	13	13	13	13	13	13	13	-	-	-	-	-	-
D5S818	chr5	123775556	123775599	[ATCT]11	11	GRCh38.p12	4	0	11	13	11	13	11	11	11	13	11	11	11	11	11	11	-	-	-	-	-	-	12	12	11	12	11	12	12	12	11	11	11	11	11	11	-	-	-	-	-	-
D6S1043	chr6	91740225	91740272	[ATCT]12	12	GRCh38.p12	4	0	12	12	12	12	12	12	12	12	12	12	12	12	12	12	-	-	-	-	-	-	12	20	12	12	12	12	12	12	12	12	12	12	12	12	-	-	-	-	-	-
D7S820	chr7	84160226	84160277	[TATC]13	13	GRCh38.p12	4	0	11	11	11	12	10	11	10	11	13	13	13	13	13	13	13.5	13.5	11.5	11.5	11.5	13.5	8	11	8/9	10	8	9	8	10	13	13	13	13	13	13	-	-	8.5/9.5	11.5	8.5	11.5
D8S1179	chr8	124894865	124894916	TCTA TCTG [TCTA]11	13	GRCh38.p12	4	0	12	13	12	13	12	13	12	13	11	11	11	11	11	11	-	-	-	-	-	-	14	15	14	15	14	15	14	15	11	11	11	11	11	11	-	-	-	-	-	-
D10S1248	chr10	129294244	129294295	[GGAA]13	13	GRCh38.p12	4	0	12	15	12	15	12	15	12	12	13	13	13	13	13	13	-	-	-	-	-	-	13	15	13	13	13	15	13	15	13	13	13	13	13	13	-	-	-	-	-	-
TH01	chr11	2171088	2171115	[AATG]7	7	GRCh38.p12	4	0	6	9.3	6	10	6	10	6	10	-	-	-	-	-	-	-	-	-	-	-	-	6	9.3	6	10	6	10	6	10	-	-	-	-	-	-	-	-	-	-	-	-
D12S391	chr12	12297020	12297095	[AGAT]11 [AGAC]7 AGAT	19	GRCh38.p12	4	0	18	24	18	19	18	18	18	19	11	11	11	11	11	11	-	-	-	-	-	-	18	23	18	18	17	18	18	18	11	11	11	11	11	11	-	-	-	-	-	-
VWA	chr12	5983977	5984044	[TAGA]11 [CAGA]5 TAGA	17	GRCh38.p12	4	0	17	17	17	17	17	17	17	17	11	11	11	11	11	11	-	-	-	-	20	20	16	19	16	17	16	18	16	17	11	11	11	11	11	11	20/21	23	21	21	23	24
D13S317	chr13	82148025	82148068	[TATC]11	11	GRCh38.p12	4	0	11	11	11	11	11	11	11	11	11	11	11	11	11	11	-	-	-	-	-	-	9	11	9	11	9	11	9	11	11	11	11	11	11	11	-	-	-	-	-	-
PENTAE	chr15	96831015	96831039	[TCTTT]5	5	GRCh38.p12	5	0	11	11	10	11	11	11	11	11	-	-	-	-	-	-	11.6	11.6	11.6	11.6	11.6	11.6	7	14	7	7	7	7	7	7	-	-	-	-	-	-	7.6	7.6	7.6	8.6	6.6	7.6
D16S539	chr16	86352702	86352745	[GATA]11	11	GRCh38.p12	4	0	11	11	11	11	11	11	11	11	11	11	11	11	11	11	-	-	-	-	11	11	9	13	9	9	9	9	9	12	11	11	11	11	11	11	-	-	-	-	-	-
D18S51	chr18	63281667	63281738	[AGAA]18	18	GRCh38.p12	4	0	15	18	15	18	15	18	15	18	18	18	18	18	18	18	-	-	15.25	15.25	-	-	16	18	16	17	16	16	16	17	18	18	18	18	18	18	-	-	-	-	-	-
D19S433	chr19	29926235	29926298	[CCTT]12 ccta CCTT cttt CCTT	14	GRCh38.p12	4	8	13	14	13	14	13	14	13	14	12	12	12	12	12	12	-	-	-	-	-	-	13	14	13	14	13	14	13	14	12	12	12	12	12	12	-	-	-	-	-	-
D21S11	chr21	19181973	19182099	[TCTA]4 [TCTG]6 [TCTA]3 ta [TCTA]3 tca [TCTA]2 tccata [TCTA]11	29	GRCh38.p12	4	11	29	30	29	30	29	29	29	30	11	11	11	11	11	11	13.25	13.25	12.25	13.25	14.25	14.25	29	31.2	29	29	29	29	29	29	11	11	11	11	11	11	13.25	13.25	13.25	14.25	13.25	14.25
PENTAD	chr21	43636205	43636269	[AAAGA]13	13	GRCh38.p12	5	0	8	12	8	12	8	12	8	12	13	13	13	13	13	13	-	-	-	-	-	-	12	13	12	13	12	13	12	12	13	13	13	13	13	13	-	-	-	-	-	-
D22S1045	chr22	37140287	37140337	[ATT]14 ACT [ATT]2	17	GRCh38.p12	3	0	16	18	16	17	16	18	16	18	14	14	14	14	14	14	13.3333	14.3333/15.3333	13.3333	14.3333/15.3333	13.3333	14.3333/15.3333	16	16	15	16	15	16	15	16	14	14	14	14	14	14	13.3333	13.3333	13.3333	13.3333	13.3333	13.3333
DYS19	chrY	9684380	9684443	[TCTA]12 ccta [TCTA]3	15	GRCh38.p12	4	4	14	14	14	15	14	14	14	14	12	12	12	12	12	12	-	-	-	-	-	-	14	14	15	15	14	14	14	14	12	12	12	12	12	12	-	-	-	-	-	-
DYS385AB-b	chrY	18639713	18639756	[TTTC]11	11	GRCh38.p12	4	0	11	14	11	11	11	11	11	11	11	11	11	11	11	11	11.5	11.5	11.5	10.5/13.5	11.5	13.5/14.5	13	16	11	11	12	11/13/14	12	13	11	11	11	11	11	11	-	-	-	-	-	-
DYS385AB-a	chrY	18680632	18680687	[TTTC]14	14	GRCh38.p12	4	0	11	14	11	12	11	14	11	14	14	14	14	14	14	14	14.5	14.5	14.5	14.5	14.5	14.5	13	16	13	13	13	14	12	13	14	14	14	14	14	14	-	-	-	-	-	-
DYS389I/II	chrY	12500448	12500611	[TAGA]n=9 [CAGA]n=3 N48 [TAGA]n=12 [CAGA]n=5	29	GRCh38.p12	4	48	13	31	31	32	31	31	-	-	9	12	9	12	9	12	-	-	-	-	-	-	14	31	-	-	-	-	-	-	9	12	9	12	9	12	-	-	-	-	-	-
DYS390	chrY	15163067	15163162	[TAGA]4 CAGA [TAGA]11 [CAGA]8	24	GRCh38.p12	4	0	24	24	24	24	24	24	23	24	19	19	19	19	19	19	-	-	-	-	-	-	24	24	24	24	24	24	24	24	19	19	19	19	19	19	-	-	-	-	-	-
DYS391	chrY	11982089	11982132	[TCTA]11	11	GRCh38.p12	4	0	10	10	10	11	10	11	10	11	11	11	11	11	11	11	-	-	-	-	-	-	10	10	10	11	10	11	10	11	11	11	11	11	11	11	-	-	-	-	-	-
DYS392	chrY	20471987	20472025	[ATA]13	13	GRCh38.p12	3	0	13	13	13	13	13	13	13	13	13	13	13	13	13	13	-	-	-	-	-	-	13	13	13	13	13	13	13	13	13	13	13	13	13	13	-	-	-	-	-	-
DYS393	chrY	3263111	3263158	[AGAT]12	12	GRCh38.p12	4	0	13	13	13	13	13	13	13	13	12	12	12	12	12	12	12.25	13.25	12.25	13.25	12.25	13.25	13	13	13	13	13	13	13	13	12	12	12	12	12	12	12.25	13.25	12.25	13.25	12.25	13.25
DYS437	chrY	12346267	12346326	[TCTA]9 [TCTG]2 [TCTA]4	15	GRCh38.p12	4	0	15	15	15	15	15	15	15	15	9	9	9	9	9	9	-	-	-	-	-	-	14	14	14	14	14	14	14	14	9	9	9	9	9	9	8.75	8.75	-	-	-	-
DYS438	chrY	12825889	12825948	[TTTTC]12	12	GRCh38.p12	5	0	11	11	11	11	11	11	11	11	12	12	12	12	12	12	11.2	12.2	11.2	13.2	11.2	11.2	9	9	9	9	9	9	9	9	12	12	12	12	12	12	9.2	9.2	9.2	9.2	9.2	9.2
DYS439	chrY	12403517	12403564	[GATA]12	12	GRCh38.p12	4	0	12	12	12	12	12	12	12	12	12	12	12	12	12	12	-	-	-	-	-	-	12	12	12	12	12	12	12	12	12	12	12	12	12	12	12.75	12.75	-	-	12.75	12.75
DYS448	chrY	22218923	22219078	[AGAGAT]n=11 [atagag]2 [agatag]3 [atag]2 agaa [AGAGAT]n=8	19	GRCh38.p12	6	42	19	19	19	19	19	19	19	19	19	19	19	19	19	19	-	-	1.92857	1.92857	-	-	19	19	19	19	19	19	19	19	19	19	19	19	19	19	-	-	2.92857	2.92857	2.92857	2.92857
DYS456	chrY	4402919	4402978	[AGAT]15	15	GRCh38.p12	4	0	17	17	16	17	17	17	16	17	15	15	15	15	15	15	-	-	-	-	-	-	17	17	17	17	16	17	17	17	15	15	15	15	15	15	-	-	-	-	-	-
DYS458	chrY	7999839	7999902	[GAAA]16	16	GRCh38.p12	4	0	18	18	18	18	18	18	18	18	16	16	16	16	16	16	-	-	-	-	-	-	17	17	17	17	17	17	17	18	16	16	16	16	16	16	-	-	-	-	-	-
DYS481	chrY	8558337	8558402	[CTT]22	22	GRCh38.p12	3	0	24	24	22	24	22	24	23	24	22	22	22	22	22	22	-	-	-	-	-	-	22	22	22	22	21	22	22	22	22	22	22	22	22	22	-	-	-	-	-	-
DYS533	chrY	16281349	16281396	[TATC]12	12	GRCh38.p12	4	0	12	12	12	12	12	12	12	12	12	12	12	12	12	12	-	-	-	-	-	-	12	12	-	-	-	-	-	-	12	12	12	12	12	12	-	-	-	-	-	-
DYS549	chrY	19358338	19358389	[GATA]13	13	GRCh38.p12	4	0	13	13	13	13	13	13	13	13	13	13	13	13	13	13	13.5	13.5	13.5	13.5	13.5	13.5	13	13	13	13	13	13	13	13	13	13	13	13	13	13	13.5	13.5	13.5	13.5	13.5	13.5
DYS570	chrY	6993190	6993257	[TTTC]17	17	GRCh38.p12	4	0	18	18	18	18	18	18	18	18	17	17	17	17	17	17	-	-	-	-	-	-	17	17	17	17	17	17	17	17	17	17	17	17	17	17	-	-	-	-	-	-
DYS576	chrY	7185318	7185385	[AAAG]19	17	GRCh38.p12	4	0	16	16	16	17	16	17	16	17	17	17	17	17	17	17	-	-	-	-	-	-	18	18	18	19	18	19	18	19	17	17	17	17	17	17	-	-	-	-	-	-
DYS635	chrY	12258860	12258951	[TAGA]9 [TACA]2 [TAGA]2 [TACA]2 [TAGA]2 [TACA]2 [TAGA]4	23	GRCh38.p12	4	0	23	23	23	23	23	23	23	23	9	9	9	9	9	9	-	-	-	-	-	-	21	21	21	21	21	21	20	21	9	9	9	9	9	9	-	-	-	-	-	-
DYS643	chrY	15314132	15314186	[CTTTT]11	11	GRCh38.p12	5	0	11	11	11	11	11	11	11	11	11	11	11	11	11	11	13	13	13	13	13	13	10	10	10	10	10	10	10	10	11	11	11	11	11	11	12	12	12	12	12	12
YGATAH4	chrY	16631673	16631720	[TCTA]12	12	GRCh38.p12	4	0	12	12	11	12	11	12	12	12	12	12	12	12	12	12	-	-	-	-	-	-	11	11	10	11	10	11	10	11	12	12	12	12	12	12	16.25	16.25	-	-	-	-

## Sheet: Sheet6
Table S6. The information of 75 forensic makers downloaded from STRBase database.
Locus	Chromosome	Start	End	Bracket Sequence	CE	Assembly	Unit Bases	Extra Bases
D1S1656	chr1	230769616	230769683	CCTA [TCTA]16	17	GRCh38.p12	4	0
D1S1677	chr1	163590026	163590085	[TTCC]15	15	GRCh38.p12	4	0
D2S1338	chr2	218014859	218014950	[GGAA]2 GGAC [GGAA]13 [GGCA]7	23	GRCh38.p12	4	0
D2S1776	chr2	168788893	168788936	[AGAT]11	11	GRCh38.p12	4	0
D2S441	chr2	68011947	68011994	[TCTA]12	12	GRCh38.p12	4	0
TPOX	chr2	1489653	1489684	[AATG]8	8	GRCh38.p12	4	0
D3S1358	chr3	45540739	45540802	TCTA TCTG [TCTA]14	16	GRCh38.p12	4	0
D3S4529	chr3	85803483	85803534	[AGAT]4 AAAT [AGAT]8	13	GRCh38.p12	4	0
D4S2408	chr4	31302798	31302833	[ATCT]9	9	GRCh38.p12	4	0
FGA	chr4	154587736	154587823	[GGAA]2 GGAG [AAAG]14 AGAA AAAA [GAAA]3	22	GRCh38.p12	4	0
CSF1PO	chr5	150076324	150076375	[ATCT]13	13	GRCh38.p12	4	0
D5S2800	chr5	59403132	59403199	[GGTA]3 [GACA]8 [GATA]3 [GATT]3	17	GRCh38.p12	4	0
D5S818	chr5	123775556	123775599	[ATCT]11	11	GRCh38.p12	4	0
D6S1043	chr6	91740225	91740272	[ATCT]12	12	GRCh38.p12	4	0
D6S474	chr6	112557951	112558018	[AGAT]5 [GATA]12	17	GRCh38.p12	4	0
SE33	chr6	88277144	88277245	[CTTT]16 TT [CTTT]9	25	GRCh38.p12	4	2
D7S820	chr7	84160226	84160277	[TATC]13	13	GRCh38.p12	4	0
D8S1179	chr8	124894865	124894916	TCTA TCTG [TCTA]11	13	GRCh38.p12	4	0
D9S1122	chr9	77073826	77073873	[TAGA]12	12	GRCh38.p12	4	0
D10S1248	chr10	129294244	129294295	[GGAA]13	13	GRCh38.p12	4	0
TH01	chr11	2171088	2171115	[AATG]7	7	GRCh38.p12	4	0
D12ATA63	chr12	107928590	107928628	[TTG]3 [TTA]10	13	GRCh38.p12	3	0
D12S391	chr12	12297020	12297095	[AGAT]11 [AGAC]7 AGAT	19	GRCh38.p12	4	0
VWA	chr12	5983977	5984044	[TAGA]11 [CAGA]5 TAGA	17	GRCh38.p12	4	0
D13S317	chr13	82148025	82148068	[TATC]11	11	GRCh38.p12	4	0
D14S1434	chr14	94842054	94842105	[CTGT]3 [CTAT]10	13	GRCh38.p12	4	0
PENTAE	chr15	96831015	96831039	[TCTTT]5	5	GRCh38.p12	5	0
D16S539	chr16	86352702	86352745	[GATA]11	11	GRCh38.p12	4	0
D17S1301	chr17	74684855	74684902	[AGAT]12	12	GRCh38.p12	4	0
D18S51	chr18	63281667	63281738	[AGAA]18	18	GRCh38.p12	4	0
D19S433	chr19	29926235	29926298	[CCTT]12 ccta CCTT cttt CCTT	14	GRCh38.p12	4	8
D20S482	chr20	4525692	4525747	[AGAT]14	14	GRCh38.p12	4	0
D21S11	chr21	19181973	19182099	[TCTA]4 [TCTG]6 [TCTA]3 ta [TCTA]3 tca [TCTA]2 tccata [TCTA]11	29	GRCh38.p12	4	11
PENTAD	chr21	43636205	43636269	[AAAGA]13	13	GRCh38.p12	5	0
D22S1045	chr22	37140287	37140337	[ATT]14 ACT [ATT]2	17	GRCh38.p12	3	0
DXS10074	chrX	67757345	67757400	[AAGA]14	14	GRCh38.p12	4	0
DXS10079	chrX	67496081	67496164	[AGAA]17 AGAG [AGAA]3	21	GRCh38.p12	4	0
DXS10101	chrX	134520485	134520619	[AAAG]3 gaaagaag [GAAA]3 a [GAAA]4 aaga [AAAG]5 aaaaagaa [AAAG]13 AA	28	GRCh38.p12	4	21
DXS10103	chrX	134284959	134285038	[TAGA]2 ctga CAGA [TAGA]11 [CAGA]4 TAGA	19	GRCh38.p12	4	4
DXS10134	chrX	150481846	150482031	[GAAA]3 gaga [GAAA]4 aa GAAA gaga [GAAA]4 gagagacagagacagagacaga GAAA gtaa [GAAA]3 aaa [GAAA]4 aaa [GAAA] 16	36	GRCh38.p12	4	42
DXS10135	chrX	9338302	9338400	[AAGA]3 GAAA gga [AAGA]18 AAAG	23	GRCh38.p12	4	3
DXS10146	chrX	150403932	150404065	[AAAG]2 a [AAAG]13 aaagaagaaa [GGAA]2 gaaagaagaa [GGGA]2 ggaaggga [GGAA]4 a [GGAA]3	26	GRCh38.p12	4	30
DXS10148	chrX	9270938	9271033	[GGAA]4 [AAGA]12 [AAAG]4 aaggaaag [AAGG]2	22	GRCh38.p12	4	8
DXS7132	chrX	65435647	65435702	[TAGA]14	14	GRCh38.p12	4	0
DXS7423	chrX	150542522	150542589	[TGGA]12 aggacaga [TGGA]3	15	GRCh38.p12	4	8
DXS8378	chrX	9402262	9402301	[ATAG]10	10	GRCh38.p12	4	0
HPRTB	chrX	134481509	134481560	[ATCT]13	13	GRCh38.p12	4	0
DYF387S1	chrY	25884581	25884724	[AAAG]n=3 GTAG [GAAG]n=4 [AAAG]n=2 GAAG [AAAG]n=2 [GAAG]n=10 [AAAG]n=13	36	GRCh38.p12	4	0
DYS19	chrY	9684380	9684443	[TCTA]12 ccta [TCTA]3	15	GRCh38.p12	4	4
DYS385AB-b	chrY	18639713	18639756	[TTTC]11	11	GRCh38.p12	4	0
DYS385AB-a	chrY	18680632	18680687	[TTTC]14	14	GRCh38.p12	4	0
DYS389III	chrY	12500448	12500611	[TAGA]n=9 [CAGA]n=3 N48 [TAGA]n=12 [CAGA]n=5	29	GRCh38.p12	4	48
DYS390	chrY	15163067	15163162	[TAGA]4 CAGA [TAGA]11 [CAGA]8	24	GRCh38.p12	4	0
DYS391	chrY	11982089	11982132	[TCTA]11	11	GRCh38.p12	4	0
DYS392	chrY	20471987	20472025	[ATA]13	13	GRCh38.p12	3	0
DYS393	chrY	3263111	3263158	[AGAT]12	12	GRCh38.p12	4	0
DYS437	chrY	12346267	12346326	[TCTA]9 [TCTG]2 [TCTA]4	15	GRCh38.p12	4	0
DYS438	chrY	12825889	12825948	[TTTTC]12	12	GRCh38.p12	5	0
DYS439	chrY	12403517	12403564	[GATA]12	12	GRCh38.p12	4	0
DYS448	chrY	22218923	22219078	[AGAGAT]n=11 [atagag]2 [agatag]3 [atag]2 agaa [AGAGAT]n=8	19	GRCh38.p12	6	42
DYS456	chrY	4402919	4402978	[AGAT]15	15	GRCh38.p12	4	0
DYS458	chrY	7999839	7999902	[GAAA]16	16	GRCh38.p12	4	0
DYS460	chrY	18888956	18888995	[CTAT]10	10	GRCh38.p12	4	0
DYS461	chrY	18888804	18888851	TCTG [TCTA]11	12	GRCh38.p12	4	0
DYS481	chrY	8558337	8558402	[CTT]22	22	GRCh38.p12	3	0
DYS505	chrY	3772790	3772837	[TCCT]12	12	GRCh38.p12	4	0
DYS522	chrY	7547585	7547624	[ATAG]10	10	GRCh38.p12	4	0
DYS533	chrY	16281349	16281396	[TATC]12	12	GRCh38.p12	4	0
DYS549	chrY	19358338	19358389	[GATA]13	13	GRCh38.p12	4	0
DYS570	chrY	6993190	6993257	[TTTC]17	17	GRCh38.p12	4	0
DYS576	chrY	7185318	7185385	[AAAG]19	17	GRCh38.p12	4	0
DYS612	chrY	13640728	13640835	[CCT]5 CTT [TCT]4 CCT [TCT]25	36	GRCh38.p12	3	0
DYS635	chrY	12258860	12258951	[TAGA]9 [TACA]2 [TAGA]2 [TACA]2 [TAGA]2 [TACA]2 [TAGA]4	23	GRCh38.p12	4	0
DYS643	chrY	15314132	15314186	[CTTTT]11	11	GRCh38.p12	5	0
YGATAH4	chrY	16631673	16631720	[TCTA]12	12	GRCh38.p12	4	0
